1 **Acetylcholine is released in the basolateral amygdala in response to predictors of reward**  
2 **and enhances learning of cue-reward contingency**

3 Richard B. Crouse<sup>1,2</sup>, Kristen Kim<sup>2</sup>, Hannah M. Batchelor<sup>2</sup>, Rufina Kamaletdinova<sup>3</sup>, Justin Chan<sup>1</sup>,  
4 Prithviraj Rajebhosale<sup>4,5</sup>, Steven T. Pittenger<sup>1</sup>, Lorna W. Role<sup>5</sup>, David A. Talmage<sup>6</sup>, Miao Jing<sup>7</sup>,  
5 Yulong Li<sup>8-10</sup>, Xiao-Bing Gao<sup>11</sup>, Yann S. Mineur<sup>1</sup>, Marina R. Picciotto<sup>1,2,\*</sup>

6 <sup>1</sup>Department of Psychiatry,

7 Yale University, 34 Park Street, 3rd Floor Research, New Haven, CT 06508, USA

8 <sup>2</sup>Yale Interdepartmental Neuroscience Program, New Haven, CT

9 <sup>3</sup>City University of New York, Hunter College, New York, NY

10 <sup>4</sup>Program in Neuroscience, Stony Brook University, NY

11 <sup>5</sup>National Institute of Neurological Disorders & Stroke (NINDS), Bethesda MD

12 <sup>6</sup>National Institute of Mental Health (NIMH), Bethesda MD

13 <sup>7</sup>Chinese Institute for Brain Research (CIBR), Beijing, China

14 <sup>8</sup>State Key Laboratory of Membrane Biology, Peking University School of Life Sciences,  
15 Beijing, China.

16 <sup>9</sup>PKU-IDG/McGovern Institute for Brain Research, Beijing, China.

17 <sup>10</sup>Peking-Tsinghua Center for Life Sciences, Academy for Advanced Interdisciplinary Studies,  
18 Peking University, Beijing, China.

19 <sup>11</sup>Section of Comparative Medicine, Yale University School of Medicine New Haven, CT

20

21 \* To whom correspondence should be addressed

22 Marina R. Picciotto

23 Dept. of Psychiatry, Yale University School of Medicine

24 34 Park Street – 3rd floor research

25 New Haven, CT 06508

26 Phone: 203-737-2041; Fax: 203-737-2043; email: [marina.picciotto@yale.edu](mailto:marina.picciotto@yale.edu)

27

28 **Running title:** BLA ACh enhances reward learning

29 **Keywords:** cholinergic, reward learning, basolateral amygdala, optogenetics, fiber photometry,

30 GRAB<sub>ACh3.0</sub>, GCaMP

31 **Abstract**

32           The basolateral amygdala (BLA) is critical for associating initially neutral cues with  
33 appetitive and aversive stimuli and receives dense neuromodulatory acetylcholine (ACh)  
34 projections. We measured BLA ACh signaling and principal neuron activity in mice during cue-  
35 reward learning using a fluorescent ACh sensor and calcium indicators. We found that ACh  
36 levels and activity of nucleus basalis of Meynert (NBM) cholinergic terminals in the BLA (NBM-  
37 BLA) increased sharply in response to reward-related events and shifted as mice learned the  
38 tone-reward contingency. BLA principal neuron activity followed reward retrieval and moved to  
39 the reward-predictive tone after task acquisition. Optical stimulation of cholinergic NBM-BLA  
40 terminal fibers during cue-reward learning led to more rapid learning of the cue-reward  
41 contingency. These results indicate that BLA ACh signaling carries important information about  
42 salient events in cue-reward learning and provides a framework for understanding how ACh  
43 signaling contributes to shaping BLA responses to emotional stimuli.

44

## 45 **Introduction**

46 Learning how environmental stimuli predict the availability of food and other natural  
47 rewards is critical for survival. The basolateral amygdala (BLA) is a brain area necessary for  
48 associating cues with both positive and negative valence outcomes (Baxter & Murray, 2002;  
49 Janak & Tye, 2015; LeDoux et al., 1990). Recent work has shown that genetically distinct  
50 subsets of BLA principal neurons encode the appetitive and aversive value of stimuli (J. Kim et  
51 al., 2016). This encoding involves the interplay between principal neurons, interneurons, and  
52 incoming terminal fibers, all of which need to be tightly regulated to function efficiently.

53 The neuromodulator acetylcholine (ACh) is released throughout the brain and can  
54 control neuronal activity via a wide range of mechanisms. ACh signals through two families of  
55 receptors (nicotinic, nAChRs and muscarinic, mAChRs) that are differentially expressed on BLA  
56 neurons as well as their afferents (Picciotto et al., 2012). ACh signals through these receptors to  
57 increase signal-to-noise ratios and modify synaptic transmission and plasticity in circuits  
58 involved in learning new contingencies (Picciotto et al., 2012), especially in areas that receive  
59 dense cholinergic input, like the BLA (Woolf, 1991; Zaborszky et al., 2012).

60 The basal forebrain complex is a primary source of ACh input to the BLA. In particular,  
61 the nucleus basalis of Meynert (NBM) sends dense cholinergic projections to the BLA (Woolf,  
62 1991; Zaborszky et al., 2012). Optical stimulation of BLA-projecting cholinergic terminal fibers  
63 (NBM-BLA) during fear conditioning is sufficient to strengthen fear memories (Jiang et al., 2016)  
64 and may support appetitive behavior (Aitta-aho et al., 2018). Cholinergic NBM neurons increase  
65 their firing in response to both rewarding and aversive unconditioned stimuli (Hangya et al.,  
66 2015). A recent study has also demonstrated that NBM cells fire in response to a conditioned  
67 stimulus during trace fear conditioning, indicating that ACh signaling may be involved in learning  
68 about cues that predict salient outcomes (Guo et al., 2019).



69           We hypothesized that ACh signaling in the BLA is a critical neuromodulatory signal that  
70 responds to both unconditioned stimuli and cues that gain salience, thereby coordinating activity  
71 in circuits necessary for learning cue-reward contingencies. To test this hypothesis, we  
72 measured relative levels of BLA ACh (ACh signaling), cholinergic NBM-BLA terminal fiber  
73 activity (BLA ACh signal origin), and the activity of BLA principal neurons (BLA output) across all  
74 phases of learning in an appetitive operant learning task to evaluate how BLA output and ACh  
75 signaling are related to behavioral performance in this paradigm. We then optically stimulated  
76 cholinergic NBM fibers locally in the BLA while mice learned to nose poke in response to an  
77 auditory cue to receive a food reward to determine if accelerating the increase in ACh signaling  
78 that occurs as mice learn the task would enhance performance. We also pharmacologically  
79 blocked different ACh receptors during the learning task to determine the subtypes involved,  
80 and varied the timing of optical stimulation of cholinergic NBM-BLA terminal fibers to determine  
81 whether time-locked ACh release with the reward-predictive cue is necessary for the  
82 improvement of the task performance. These studies provide a novel framework for  
83 understanding how NBM ACh signaling in the BLA is recruited during perception of novel stimuli  
84 and how it contributes to linking previously neutral cues to predictions about future salient  
85 outcomes.

86

## 87 **Results**

### 88 **Acetylcholine release in the BLA occurs at salient points in the cue-reward learning task** 89 **and shifts as mice learn the cue-reward contingency**

90           The BLA is critical for learning that previously neutral cues can predict future  
91 punishments or rewards and for assigning valence to those cues (Baxter & Murray, 2002; Janak  
92 & Tye, 2015). The BLA receives dense cholinergic input (Woolf, 1991; Zaborszky et al., 2012)

93 and we speculated that, since ACh signaling is involved in both attention and several types of  
94 learning (Picciotto et al., 2012), it could be essential for learning about cues that predict salient  
95 events, such as reward delivery. Based on data showing that ACh neurons fire in response to  
96 unexpected or salient events (Hangya et al., 2015), we also hypothesized that ACh release  
97 might vary as mice learn a cue-reward contingency. Therefore, we designed a cue-reward  
98 learning task in which food-restricted mice were trained to perform a nose poke when signaled  
99 by a cue (tone) to receive a palatable reward (Ensure) on a 30 sec variable intertrial interval  
100 (ITI) (**Fig. 1A-D**). We injected adeno-associated virus (AAV) carrying an improved version of the  
101 fluorescent ACh sensor GRAB<sub>ACh3.0</sub> (ACh3.0; (Jing et al., 2018, 2019) construct into the BLA of  
102 mice and implanted an optical fiber above the BLA to record ACh signaling during the cue-  
103 reward learning task (**Fig. 2A + S2.1A**).

104 During the Pre-Training phase of the task, mice received reward and cue light  
105 presentation for performing a nose poke in the active port during tone presentation (**Fig. 1C**,  
106 purple active nose poke coincident with tone) but there was no consequence for an incorrect  
107 nose poke (**Fig. 1C**, red active nose poke not coincident with tone). Animals quickly learned to  
108 make a high number of responses over the course of each Pre-Training session. In this  
109 paradigm, mice obtained most available rewards by day 5 of Pre-Training (**Fig. 2B**, blue shaded  
110 region). However, this phase of training did not promote learning of the cue-reward contingency,  
111 (i.e. that they should only nose poke during tone presentation) seen by the high number of  
112 incorrect nose pokes (**Fig. S2.2A**, blue shaded region). Mice performed roughly 8-fold more  
113 incorrect nose pokes than correct nose pokes, suggesting that mice were not attending to the  
114 task contingency. The Training phase of the task was identical to Pre-Training except incorrect  
115 nose pokes resulted in a 5 sec timeout, during which the house light was illuminated, that  
116 concluded with a restarting of the ITI timer (**Fig. 1D**, red active nose poke not coincident with  
117 tone). On day 1 of the Training phase, all animals earned fewer rewards (**Fig. 2B**, pink shading)

118 and, while still high, incorrect nose pokes dropped (**Fig. S2.2A**, pink shading). Animals that did  
119 not progress to the cut off for acquisition by day 9 (defined as consistently earning 20 or more  
120 rewards per session, **Fig. 2B**, white horizontal line) were moved to a 20 sec variable ITI to  
121 promote responding (**Fig. 2B**, pink shading day 10). Following the change in ITI, mice acquired  
122 the cue-reward behavior at different rates. After acquisition, animals were switched to Extinction  
123 training in which correct nose pokes did not result in reward delivery, and all mice decreased  
124 nose poke responding (**Fig. 2B + Fig. S2.2A**, orange shading).

125         During Pre-Training, when there were high numbers of both correct and incorrect nose  
126 pokes, there was a large increase in ACh release following correct nose pokes, which were  
127 followed by reward delivery and cue light, but not incorrect nose pokes (**Fig. 2C + Fig. S2.1 B-**  
128 **C**). ACh release occurred in response to different events as mice learned the task (example  
129 data for each mouse is shown in **Fig. 2D + Fig. S2.1D-F** and averaged data across all mice at  
130 key time points in the task is shown in **Fig. 2E**). During Pre-Training rewarded trials, the highest  
131 levels of ACh release occurred immediately after correct nose pokes (NP), with a smaller peak  
132 at the time of reward retrieval (entry into the reward receptacle, Rec). As Training began, the  
133 ACh release during reward trials shifted dramatically toward the time of reward retrieval, likely  
134 because the animals were learning that many nose poke events did not result in reward  
135 delivery. Incorrect nose pokes that triggered a timeout were also followed by a modest increase  
136 in BLA ACh levels (**Fig. S2.2B-G**). As mice began to learn the contingency (**Fig. 2E**, 10  
137 rewards, white horizontal dashed line), the peak ACh release during rewarded trials shifted back  
138 to the time of the correct nose poke response but the peak following incorrect nose pokes  
139 remained (**Fig. S2.2C-G**). As animals approached the acquisition criterion (**Fig. 2E**, Acq., white  
140 horizontal line), ACh level also increased at the time of the tone and decreased at the time of  
141 reward, suggesting that as animals learned the cue-reward contingency, the tone became a  
142 more salient event. After task acquisition, the increase in ACh following correct nose pokes

143 remained but was diminished, while incorrect nose pokes no longer elicited apparent ACh  
144 release. During Extinction, ACh release to tone onset diminished.

145           In order to determine the source of the ACh released in the BLA during cue-reward  
146 learning, we recorded calcium dynamics as a measure of cell activity of ChAT<sup>+</sup> NBM terminal  
147 fibers in the BLA (NBM-BLA), since the NBM is a major source of cholinergic input to the BLA  
148 (Jiang et al., 2016; Woolf, 1991; Zaborszky et al., 2012). We injected AAV carrying a Cre-  
149 recombinase-dependent, genetically-encoded calcium indicator (DIO-GCaMP7s) into the NBM  
150 of ChAT-IRES-Cre mice and implanted an optical fiber above the ipsilateral BLA (**Fig. 2F + Fig.**  
151 **S2.3A-D**). Mice in this cohort learned in a similar fashion (**Fig. 2G + Fig. S2.4A**) but met the  
152 acquisition criteria faster than mice in the ACh3.0 sensor recording experiment because aspects  
153 of the behavioral setup were optimized for the imaging apparatus. As with the recording of  
154 ACh3.0 sensor, there was a dramatic difference in NBM-BLA cholinergic terminal activity  
155 between correct vs incorrect nose pokes (**Fig. 2H + Fig. S2.3 E-F**). NBM-BLA cholinergic  
156 terminal activity evolved across phases of the reward learning task as was seen for ACh levels  
157 in the BLA (data for each mouse shown in **Fig. 2I + S2.3G**, averaged across all mice at key time  
158 points in the task shown in **Fig. 2J**). Strikingly, NBM-BLA cholinergic terminal activity followed  
159 correct nose pokes in Pre-Training and shifted primarily to tone onset as mice learned the  
160 contingency during Training. Incorrect nose pokes that resulted in a timeout in Training sessions  
161 were followed by a modest increase in NBM-BLA cholinergic terminal activity before task  
162 acquisition, similar to what was seen for ACh levels (**Fig. S2.4 B-E**). During Extinction, activity  
163 of NBM-BLA terminals following tone onset diminished.

164           In order to record NBM-BLA cholinergic terminal activity and BLA ACh levels  
165 simultaneously in the same mouse, we injected AAV carrying a construct for Cre-recombinase  
166 dependent red-shifted genetically-encoded calcium indicator (DIO-jRCaMP1b) into the NBM of  
167 ChAT-IRES-Cre mice, ACh3.0 sensor into the ipsilateral BLA, and implanted a fiber above the

168 BLA (**Fig. S2.5A-E**, mouse 1). DIO-jRCaMP1b was also injected into the NBM of a wild type  
169 littermate so Cre-mediated recombination would not occur to control for any crosstalk between  
170 the ACh3.0 and jRCaMP1b channels. We found that NBM-BLA cholinergic terminal activity  
171 coincided with ACh levels (**Fig. S2.5F-G**). Importantly, this relationship between ACh release  
172 and NBM-BLA terminal fiber activity was not explained by signal crosstalk (**Fig. S2.5H**), further  
173 indicating that the BLA ACh measured comes at least in part from the NBM.

174

### 175 **BLA principal neurons respond to reward availability and follows cue-reward learning**

176         Glutamatergic principal cells are the primary output neurons of the BLA (Janak & Tye,  
177 2015), and their firing is modulated by NBM-BLA cholinergic signaling (Jiang et al., 2016; Unal  
178 et al., 2015). BLA principal neurons can increase their firing in response to cues as animals  
179 learn cue-reward contingencies (Sanghera et al., 1979; Schoenbaum et al., 1998; Tye & Janak,  
180 2007). To determine whether ACh modulates principal neuron activity during cue-reward  
181 learning, we injected AAV carrying a Cre-recombinase dependent genetically encoded calcium  
182 indicator (DIO-GCaMP6s) into the BLA of CaMKII $\alpha$ -Cre mice to record BLA principal cell activity  
183 during the learning task (**Fig. 3A + S3.1A**). As was seen for BLA ACh levels, there was a  
184 substantial difference in BLA principal cell activity following correct and incorrect nose pokes on  
185 the last day of Pre-Training (**Fig. 3B**). However, the activity peaked later after the nose poke  
186 response (~2.5 sec) compared to the ACh3.0 signal (~0.5 sec) and appeared to align more  
187 tightly with reward retrieval (**Fig. S3.1B**). As mice learned the task (**Fig. 3C + Fig. S3.2A**), BLA  
188 principal cell activity increased first in response to reward and after acquisition of the task, to the  
189 reward-predictive cue (individual data for each mouse shown in **Fig. 3D + Fig. S3.1E-F**, and  
190 averaged data across all mice at key time points in task is shown in **Fig. 3E**). During Pre-  
191 Training, the highest levels of BLA principal cell activity followed reward retrieval. In addition,  
192 during the first few days of Training, BLA principal cell activity after reward retrieval was higher

193 than it was during Pre-Training, and the magnitude of response decreased as mice learned the  
194 contingency and earned more rewards, ultimately reaching similar intensity to that observed  
195 during Pre-Training. Concurrently, as mice approached acquisition of the task (**Fig. 3C**, white  
196 horizontal line), BLA principal cell activity increased in response to tone onset (**Fig. 3D-E + Fig.**  
197 **S3.1E-F**, Acq., white horizontal line), suggesting that the recruitment of BLA principal cell  
198 activity likely reflects the association of the cue with a salient outcome (Lutas et al., 2019;  
199 Sengupta et al., 2018). Incorrect nose pokes that triggered a timeout did not elicit a different  
200 response in principal cell activity compared to before timeouts were incorporated (**Fig. S3.2 B-**  
201 **F**).

202

### 203 **Stimulation of cholinergic terminals in BLA improves cue-reward learning**

204 Since ACh released by NBM-BLA terminals during Training shifted to tone onset during  
205 acquisition of cue-reward learning (**Fig. 2E, J**), we hypothesized that ACh may potentiate  
206 learning the cue-reward contingency. We therefore tested whether increasing ACh release in  
207 BLA during learning could alter cue-reward learning by injecting AAV carrying a Cre-  
208 recombinase-dependent channelrhodopsin-EYFP (AAV-DIO-ChR2-EYFP) construct bilaterally  
209 into the NBM of ChAT-IRES-Cre transgenic mice and placing fibers over the BLAs to optically  
210 stimulate cholinergic terminals originating from the NBM selectively (**Fig. 4A + Fig. S4.1**).

211 Optical control over ChAT<sup>+</sup> NBM cells was verified by *ex vivo* slice recordings (**Fig. 4B**). After  
212 shaping, ChAT<sup>+</sup> NBM-BLA terminals were stimulated via bilateral optical fibers triggered by a  
213 correct nose poke throughout both Pre-Training (**Fig. 4C**) and Training (**Fig. 4D**). Stimulation  
214 occurred during at least a portion of all three components of a rewarded trial: tone, correct nose  
215 poke, and reward retrieval, since these events were often separated by short latencies.

216 As seen in previous experiments, during the Pre-Training phase animals made a high  
217 number of nose poke responses over the course of each session, obtained most available  
218 rewards by the last day (**Fig. 4E + Fig. S4.2A**, blue shading), and committed a very high  
219 number of incorrect nose pokes (**Fig. 4F + Fig. S4.2B**, blue shading). There were no  
220 differences in rewards earned (main effect of group (EYFP vs. ChR2) in a two-way repeated-  
221 measures ANOVA,  $F(1, 9) = 1.733$ ,  $p = 0.2205$ ) or incorrect nose pokes (main effect of group  
222 (EYFP vs. ChR2) in a two-way repeated-measures ANOVA,  $F(1, 9) = 0.002433$ ,  $p = 0.9617$ )  
223 between the EYFP control ( $n = 5$ ) and ChR2 ( $n = 6$ ) groups during the Pre-Training phase (**Fig.**  
224 **4E-F + Fig. S4.2A-B**, blue shading), suggesting that increasing BLA ACh signaling was not  
225 sufficient to modify behavior during the Pre-Training phase of the task.

226 On Day 1 of the Training phase, all animals earned fewer rewards (**Fig. 4E + Fig. S4.2A**,  
227 pink shading) and incorrect nose pokes remained high (**Fig. 4F + Fig. S4.2B**, pink shading). As  
228 the animals learned that a nose poke occurring outside of the cued period resulted in a timeout,  
229 both control EYFP and ChR2 groups learned the contingency and improved their performance,  
230 resulting in acquisition of the cue-reward task (20 rewards earned). However, significant group  
231 differences emerged, such that ChR2 mice earned significantly more rewards than EYFP  
232 controls (**Fig. 4E + Fig. S4.2A**, pink shaded; main effect of group (EYFP vs. ChR2) in a two-way  
233 repeated-measures ANOVA,  $F(1, 9) = 9.434$ ,  $p = 0.0133$ ), and there was a significant Day x  
234 Group (EYFP vs. ChR2) interaction (two-way repeated-measures ANOVA,  $F(11, 99) = 3.210$ ,  $p$   
235  $= 0.0009$ ). ChR2 mice also made significantly fewer incorrect nose pokes than control mice  
236 (**Fig. 4F + Fig. S4.2B**, pink shaded; two-way repeated-measures ANOVA,  $F(1, 9) = 12.67$ ,  $p =$   
237  $0.0061$ ), suggesting that the ChR2 group learned the tone-reward contingency more quickly  
238 than the EYFP group. EYFP mice were able to reach the same peak cue-reward performance  
239 as the ChR2 group only after 4-6 additional days of training. Once peak performance was  
240 achieved, there was no difference in extinction learning between the groups (main effect of



241 group (EYFP vs. ChR2) in a two-way repeated-measures ANOVA,  $F(1, 9) = 2.293$ ,  $p = 0.1643$ .  
242 While sex differences in the behavior were not formally tested side by side, an independent  
243 cohort of male mice (EYFP  $n = 7$ , ChR2  $n = 7$ , **Fig. S4.3**) was tested to determine whether both  
244 male and female mice would respond to ACh stimulation, revealing similar trends during  
245 Training for rewards earned (**Fig. S4.2C,E**, pink shaded; two-way repeated-measures ANOVA,  
246 Group main effect (EYFP vs. ChR2):  $F(1, 12) = 3.636$ ,  $p = 0.0808$ , Day x Group interaction:  $F$   
247  $(11, 132) = 3.033$ ,  $p = 0.0012$ ) and incorrect nose pokes (**Fig. S4.2D,F**, red shaded; two-way  
248 repeated-measures ANOVA, Group main effect (EYFP vs. ChR2):  $F(1, 12) = 4.925$ ,  $p =$   
249  $0.0465$ ).

250 In order to determine if optical stimulation of NBM-BLA cholinergic terminals improved  
251 performance in the task by increasing the rewarding value of the outcome, rather than  
252 enhancing cue-reward learning by some other means, we allowed mice to nose poke for optical  
253 stimulation rather than for Ensure (**Fig. S4.4A**). There were no differences between the EYFP  
254 control and ChR2 groups (two-way repeated-measures ANOVA,  $F(1, 9) = 0.6653$ ,  $p = 0.4357$ ).  
255 We also tested whether NBM-BLA cholinergic terminal activation was reinforcing on its own by  
256 stimulating these terminals in a real-time place preference test. Mice were allowed to explore  
257 two similar compartments to determine baseline preference, and NBM-BLA cholinergic  
258 terminals were then stimulated in one of the two chambers to determine whether it increased  
259 time spent in the stimulation-paired chamber. There was no difference between groups (**Fig.**  
260 **S4.4B**, main effect of group (EYFP vs. ChR2) in a two-way repeated-measures ANOVA,  $F(1, 9)$   
261  $= 0.1311$ ,  $p = 0.7257$ ) in place preference, confirming that optical activation of NBM-BLA  
262 cholinergic terminals is not innately rewarding. Stimulation of NBM-BLA cholinergic terminals  
263 also did not lead to changes in nose poke behavior in an uncued progressive ratio task (**Fig.**  
264 **S4.4C**, main effect of group (EYFP vs. ChR2) in a two-way repeated-measures ANOVA,  $F(1,$   
265  $12) = 0.0009814$ ,  $p = 0.975$ ). Locomotor behavior was also not significantly affected by NBM-



266 BLA cholinergic terminal activation (**Fig. S4.4D**, two-way repeated-measures ANOVA,  $F(1, 9) =$   
267  $0.05804$ ,  $p = 0.8150$ .) Finally, to determine whether there was any effect of NBM-BLA  
268 cholinergic terminal stimulation on preference for, or avoidance of, a stressful environment, mice  
269 were tested for changes in time spent in the dark or light side due to laser stimulation in the  
270 Light/Dark Box test, and there were no differences between the groups (**Fig. S4.4E-F**, unpaired  
271 t-tests, number of crosses:  $p = 0.3223$ ; time in light side:  $p = 0.1565$ ).

272

273 **Muscarinic, but not nicotinic, receptors are required for acquisition of the cue-reward**  
274 **contingency**

275 ACh signals through multiple receptor subtypes, with rapid, ionotropic signaling  
276 mediated through stimulation of nAChRs, and metabotropic signaling mediated through  
277 stimulation of mAChRs (Picciotto et al., 2012). To determine which ACh receptors were involved  
278 in this cue-reward learning task, mice were injected intraperitoneally with saline ( $n = 8$ ),  
279 mecamylamine (non-competitive nicotinic antagonist, Mec,  $n = 9$ ), scopolamine (competitive  
280 muscarinic antagonist, Scop,  $n = 8$ ), or a combination of both antagonists (Mec+Scop,  $n = 9$ ) 30  
281 min prior to Pre-Training and Training, during the same epochs of the task in which optical  
282 stimulation was administered (**Fig. 5A**). Like optical stimulation, blockade of ACh receptors  
283 during the Pre-Training phase of the task had no effect on rewards earned (**Fig. 5B + Fig.**  
284 **S5.1A**, blue shading, main effect of Group (antagonist) in a two-way repeated-measures  
285 ANOVA,  $F(3, 30) = 1.285$ ,  $P=0.2973$ ) or on the large number of incorrect nose pokes (**Fig. 5C +**  
286 **Fig. S5.1B**, blue shading, main effect of Group (antagonist) in a two-way repeated-measures  
287 ANOVA,  $F(3, 30) = 1.496$ ,  $p = 0.2356$ ). In contrast, blockade of muscarinic signaling abolished  
288 the ability of mice to learn the correct cue-reward contingency during the Training period (**Fig.**  
289 **5B + Fig. S5.1A**, pink shading, two-way repeated-measures ANOVA, Antagonist main effect:  $F$   
290  $(3, 30) = 23.13$ ,  $p < 0.0001$ , Day x Antagonist interaction:  $F(33, 330) = 10.79$ ,  $p < 0.0001$ ), with

291 these mice maintaining high levels of incorrect nose pokes for the duration of Training  
292 compared to Saline and Mec treated mice (**Fig. 5C + Fig. S5.1B**, pink shading, main effect of  
293 Group (antagonist) in a two-way repeated-measures ANOVA,  $F(3, 30) = 25.64$ ,  $p < 0.0001$ ).  
294 Saline and Mec groups were not significantly different in any phase of the task, including across  
295 Extinction (**Fig. 5B-C + Fig. S5.1A-B**, orange shading, main effect of Group (antagonist) in a  
296 two-way repeated-measures ANOVA,  $F(1, 15) = 1.201$ ,  $p = 0.2903$ ). Consistent with the  
297 inability to acquire the cue-reward contingency, mice treated with Scop or Mec+Scop also  
298 obtained very few rewards during Extinction (**Fig. 5B + Fig. S5.1A**, orange shading). The  
299 antagonists had no effect on locomotion as measured by beam breaks (**Fig. S5.1C**) one-way  
300 ANOVA,  $F(3, 30) = 0.5074$ ,  $p = 0.6802$ ).

301

### 302 **ACh-mediated accelerated cue-reward learning does not require contingent stimulation** 303 **of ChAT<sup>+</sup> NBM terminals in the BLA**

304 Acetylcholine is often thought of as a neuromodulator (Picciotto et al., 2012), and the  
305 window for cholinergic effects on synaptic plasticity varies across ACh receptor subtypes (Gu &  
306 Yakel, 2011). It is therefore possible that ACh signaling may result in intracellular signaling  
307 changes that outlast the cue presentation window. In order to determine if the effect of NBM-  
308 BLA stimulation is dependent upon the timing of correct nose poke and laser stimulation  
309 contingency, we repeated the experiment in an independent cohort of mice with an additional  
310 yoked, non-contingent ChR2 group that received the same number of stimulation trains as the  
311 contingent ChR2 group, but in which light stimulation was explicitly unpaired with task events  
312 (**Fig. 6A + Fig. S6.1**). As in the previous experiment, there were no differences between the  
313 EYFP control ( $n = 6$ ) and stimulation groups (contingent ChR2  $n = 5$  and Yoked non-contingent  
314 ChR2  $n = 5$ ) during Pre-Training (**Fig. 6B-C + Fig. S6.2 A-B**, blue shading; main effect of group  
315 (EYFP vs. contingent ChR2 vs. Yoked non-contingent ChR2) two-way repeated-measures

316 ANOVAs; rewards earned:  $F(2, 13) = 0.7008$ ,  $p = 0.5140$ ; incorrect nose pokes:  $F(2, 13) =$   
317  $0.3906$ ,  $p = 0.6843$ ). However, the Yoked non-contingent ChR2 group was not significantly  
318 different from the contingent ChR2 group during the Training period with respect to number of  
319 rewards earned (two-way repeated-measures ANOVA,  $F(1, 8) = 0.09147$ ,  $p = 0.7700$ ) or  
320 incorrect nose pokes (two-way repeated-measures ANOVA,  $F(1, 8) = 0.3681$ ,  $p = 0.5609$ ), but  
321 both ChR2 groups were significantly better than the EYFP control group (**Fig. 6B-C + Fig. S6.2**  
322 **A-B**, pink shading; two-way repeated-measures ANOVAs; rewards earned: Group (EYFP vs.  
323 contingent ChR2 vs. Yoked ChR2) main effect:  $F(2, 13) = 7.254$ ,  $p = 0.0077$ ; Day x Group  
324 interaction:  $F(22, 143) = 1.861$ ,  $p = 0.0164$ . Incorrect nose pokes: Group main effect:  $F(2, 13)$   
325  $= 4.884$ ,  $p = 0.0262$ ). These results demonstrate that ACh release does not have to be time-  
326 locked to the cue, nose poke, or reward retrieval to improve performance of the task, suggesting  
327 that ACh may alter the threshold for neuronal plasticity for cue-reward pairing over a much  
328 longer timescale than might be expected based on results from the ACh3.0 recording and NBM-  
329 BLA recordings, which could be consistent with the involvement of mAChR signaling in this  
330 effect. As in the previous experiment, once all groups reached criterion for acquisition of the  
331 cue-reward contingency, there were no differences between any of the groups during Extinction  
332 (**Fig. 6B-C + Fig. S6.2 A-B**, orange shaded; two-way repeated-measures ANOVA,  $F(2, 13) =$   
333  $0.04229$ ,  $p = 0.9587$ ).

334

## 335 Discussion

336 It is increasingly recognized that the BLA is involved in learning to predict both positive  
337 and negative outcomes from previously neutral cues (Cador et al., 1989; Janak & Tye, 2015;  
338 LeDoux et al., 1990). Cholinergic cells in the basal forebrain complex fire in response to both  
339 positive and negative reinforcement (Hangya et al., 2015). The results shown here indicate that  
340 ACh signaling in the BLA is intimately involved in cue-reward learning. Endogenous ACh is

341 released in the BLA in response to salient events in the task, and ACh dynamics evolved as the  
342 subject formed associations between stimuli and reward. While the pattern of ACh signaling in  
343 the BLA may seem reminiscent of how dopamine neurons encode reward prediction errors as  
344 measured in other brain areas (Schultz et al., 1997), the current results suggest that ACh  
345 release in the BLA may instead be involved in signaling a combination of salience and novelty.  
346 ACh release and NBM-BLA activity increased following correct nose poke and, around the time  
347 that animals acquired the cue-reward task, following tone onset. However, earlier in training,  
348 incorrect nose pokes that resulted in a timeout were also followed by ACh release, although this  
349 was lower in magnitude. Further, stimulating NBM-BLA cholinergic terminals during learning  
350 enhanced behavioral performance, but was not intrinsically rewarding on its own and did not  
351 support responding for the tone alone. Although ACh was released in the BLA at discrete points  
352 during the task, the effects of heightened BLA ACh signaling were relatively long lasting, since it  
353 was not necessary for stimulation to be time-locked to cue presentation or reward retrieval to  
354 enhance behavioral performance. Thus, cholinergic inputs from the basal forebrain complex to  
355 the BLA are a key component of the circuitry that links salient events to previously neutral  
356 stimuli in the environment and uses those neutral cues to predict future rewarded outcomes.

357

### 358 **BLA ACh signaling and principal cell activity are related to cue-reward learning**

359 We have shown that ACh release in the BLA is coincident with the stimulus that was  
360 most salient to the animal at each phase of the task. Use of the fluorescent ACh sensor was  
361 essential in determining these dynamics. Previous microdialysis studies have shown that ACh is  
362 released in response to positive, negative, or surprising stimuli, but this technique is limited by  
363 relatively long timescales (minutes) and cannot be used to determine when cholinergic  
364 transients align to given events in an appetitive learning task and how they evolve over time  
365 (Sarter & Lustig, 2020). In this cue-reward learning paradigm, when there was no consequence

366 for incorrect nose-poking (Pre-Training phase), animals learned to perform a very high number  
367 of nose pokes and received a large number of rewards, and BLA ACh signaling peaked  
368 following correct nose pokes. Both the behavioral response (nose poking that was not  
369 contingent with the tone) and the ACh response (linked to the correct nose poke) suggest that  
370 the animals were not attending to the tone during the Pre-Training phase of the task, but rather  
371 were attending to the cues associated with reward delivery, such as the reward light or the  
372 sound of the pump that delivered the reward. Consistent with this possibility, in the next phase  
373 of the task when mice received a timeout for responding if the tone was not presented,  
374 performance of all groups dropped dramatically. Interestingly, in the early Training sessions,  
375 ACh release shifted to reward retrieval, likely because this was the most salient aspect of the  
376 task when the majority of nose pokes performed did not result in reward. Finally, as mice  
377 acquired the contingency between tone and reward availability, the tone also began to elicit ACh  
378 release in the BLA, suggesting that mice learned that the tone is a salient event predicting  
379 reward availability. Since there are multiple sources of ACh input to the BLA, it was important to  
380 determine whether NBM cholinergic neurons were active during the periods when ACh levels  
381 were high (Woolf, 1991). Recordings from cholinergic NBM-BLA terminal fibers showed similar  
382 dynamics to ACh measurements, suggesting that the NBM is a primary source of ACh across  
383 the phases of cue-reward learning.

384         Perhaps the most well-known example of dynamic responding related to learning cue-  
385 reward contingencies and encoding of reward prediction errors is the firing of dopaminergic  
386 neurons of the ventral tegmental area (VTA; Schultz, 1998). After sufficient pairings,  
387 dopaminergic neurons will fire in response to the cue that predicts the reward, and no longer to  
388 the rewarding outcome, which corresponds with behavioral changes that indicate an association  
389 has been formed between conditioned stimuli (CS) and unconditioned stimuli (US). Plasticity  
390 related to learning has also been observed in cholinergic neurons in the basal forebrain complex

391 during aversive trace conditioning, such that after several training days, neuronal activity spans  
392 the delay between CS and US (Guo et al., 2019). Additionally, a recent study suggested that  
393 ACh may signal a valence-free reinforcement prediction error (Sturgill et al., 2020). Future  
394 studies on the selective inputs to NBM to BLA cholinergic neurons would be of interest to  
395 identify the links between brain areas involved in prediction error coding.

396 We found that BLA principal cells were most reliably activated following reward retrieval  
397 before contingency acquisition (both when they were receiving several rewards but no timeouts  
398 in Pre-Training and few rewards early in Training). Similar to the recording of ACh levels, after  
399 acquisition, the tone began to elicit an increase in BLA principal cell population activity.  
400 However, activity of principal neurons differed from ACh signaling in the BLA in important ways.  
401 ACh was released in response to the salient events in the task that were best able to predict  
402 reward delivery or availability. In contrast, the activity of BLA principal neurons was not tightly  
403 time-locked to correct nose poking, and instead followed reward retrieval until acquisition, when  
404 activity increased in response to tone onset. The divergent dynamics of ACh release and  
405 principal neuron activity underscores that ACh's role in the BLA is to modulate, rather than  
406 drive, the activity of principal neurons, and therefore may alter dynamics of the network through  
407 selective engagement of different populations of GABA interneurons (Unal et al., 2015).

408

#### 409 **Increasing BLA acetylcholine levels enhances cue-reward learning**

410 Neuronal activity and plasticity in the BLA is required for both acquisition of appetitive  
411 learning (conditioned reinforcement) and fear conditioning, however the inputs that increase  
412 activity in the structure during salient events likely come from many brain areas (McKernan &  
413 Shinnick-Gallagher, 1997; Rogan et al., 1997; Tye et al., 2008). In particular, dopaminergic  
414 inputs to the BLA are important for acquisition of conditioned reinforcement and for linking the

415 rewarding properties of addictive drugs to cues that predict their availability (Cador et al., 1989).  
416 Our results indicate that ACh is a critical neuromodulator upstream of the BLA that is responsive  
417 to salient events, such as reward availability, motor actions that elicit reward, and cues that  
418 predict reward. We show here that increasing endogenous ACh signaling in the BLA caused  
419 mice to perform significantly better than controls in an appetitive cued-learning task. Heightened  
420 ACh release during learning of a cue-action-reward contingency led to fewer incorrect  
421 responses and increased acquisition rate in both female and male mice. The optical stimulation  
422 was triggered by correct nose poke, thus the cholinergic NBM-BLA terminal fiber stimulation  
423 overlapped with all three salient events: tone, nose poke, and reward retrieval, since the tone  
424 terminated 2 sec after correct nose poke. Therefore, the initial optical stimulation of ACh release  
425 coincided with the tone and correct nose poke from the beginning of training in ChR2 mice,  
426 approximating the ACh signature in mice that had already acquired the cue-reward contingency.  
427 We hypothesize that it was this premature increase in ACh levels at the time of cue presentation  
428 that was important in allowing the animals to learn the contingency earlier.

429         It is possible that ACh increased learning by increasing the intensity of the reward,  
430 potentiating the learned association, improving discrimination, or a combination of these  
431 phenomena. However, increasing ACh release in the BLA was not inherently rewarding,  
432 because it did not support self-stimulation or real-time place preference. This is at odds with a  
433 recent study that found stimulation of NBM-BLA cholinergic terminals could induce a type of  
434 place-preference and modest self-stimulation (Aitta-aho et al., 2018). It is possible that slight  
435 differences in targeting of ChR2 infusion or differences in the behavioral paradigm could be  
436 responsible for the lack of direct rewarding effects of optical ChAT terminal stimulation in the  
437 current study. Other recent work (Jiang et al., 2016) has demonstrated that stimulating this  
438 NBM-BLA cholinergic pathway is sufficient to strengthen cued aversive memory, suggesting that  
439 the effect of ACh in the BLA may not be inherently rewarding or punishing, but instead

440 potentiates plasticity in the BLA, allowing learning of cue-outcome contingencies. Similarly, it is  
441 possible that ACh alters motor activity. However, there were no effects of optical stimulation on  
442 locomotion or responding in the inactive nose poke port. In addition, during the Pre-Training  
443 phase when there was no consequence for incorrect nose pokes, all groups earned the same  
444 number of rewards, regardless of optical stimulation or pharmacological blockade of ACh  
445 receptors, suggesting that ACh is not involved in the motor aspects of the task or the value of  
446 the reward. Indeed, differences emerged only during the Training phase, when attention to the  
447 tone was critical to earn rewards. Further, incorrect nose poking remained high for mice  
448 administered scopolamine. This suggests that scopolamine-treated animals were seeking the  
449 reward, as in the shaping and Pre-Training phases of training, but were unable to learn that they  
450 should only nose poke in response to the tone.

451 Cell-type-specific expression of AChRs and activity-dependent effects place cholinergic  
452 signaling at a prime position to shape BLA activity during learning. For instance, late-firing  
453 interneurons in the BLA exhibit nAChR-dependent EPSP's when no effect is seen on fast-  
454 spiking interneurons, while principal neurons can be either excited or inhibited through  
455 mAChRs, depending on activity level of the neuron at the time of cholinergic stimulation (Unal et  
456 al., 2015). BLA mAChRs can support persistent firing in principal neurons and can be important  
457 for the expression of conditioned place preference behavior, as well as trace fear conditioning  
458 (Baysinger et al., 2012; Egorov et al., 2006; McIntyre et al., 1998). Similar to studies of trace  
459 fear conditioning, in which activity of the network over a delay period must be maintained, we  
460 found that metabotropic (mAChRs) but not ionotropic (nAChRs) ACh receptors were required  
461 for learning the contingency of this cue-reward task. The timing of cholinergic signaling is a  
462 critical factor in the induction of synaptic plasticity in other brain regions, so we hypothesized  
463 that the enhancement of cue-reward learning observed might be dependent upon when NBM-  
464 BLA terminal fibers were stimulated with respect to tone presentation and/or behavioral



465 responses (Gu & Yakel, 2011). However, we found that heightened ACh signaling in the BLA  
466 improved behavioral performance even when stimulations were explicitly unpaired with the cue  
467 or correct nose poking. This suggests that the effect of increased cholinergic signaling in the  
468 BLA is long lasting, and that stimulation across a learning session is sufficient to potentiate  
469 synaptic events linking the cue to a salient outcome. Coupled with pharmacological evidence  
470 demonstrating that muscarinic signaling is necessary for reward learning in this task, this time  
471 course suggests the involvement of metabotropic signaling downstream of muscarinic receptors  
472 that outlasts the initial cholinergic stimulation.

473         To conclude, the abundant ACh input to the BLA results in ACh release in response to  
474 stimuli that predict reward in a learned cue-reward task. Mimicking this increase in cholinergic  
475 signaling results in accelerated learning of the cue-reward contingency. These findings are  
476 consistent with the hypothesis that ACh is a neuromodulator that is released in response to  
477 salient stimuli and suggests that ACh signaling may enhance neuronal plasticity in the BLA  
478 network, leading to accelerated cue-reward learning.

## 479 **Materials and Methods**

### 480 **Animals**

481 All procedures were approved by the Yale University Institutional Animal Care & Use  
482 Committee in compliance with the National Institute of Health's Guide for the Care and Use of  
483 Laboratory Animals. Experiments were performed in mice of both sexes, in keeping with the NIH  
484 policy of including sex as a biological variable. Sex of mice in behavioral graphs is indicated by  
485 circles for females and squares for males.

486 Female and male heterozygous mice with Cre recombinase knocked into the choline  
487 acetyltransferase (ChAT) gene (ChAT-IRES-Cre, B6;129S6-Chattm2(cre)Lowl/J, Stock number:  
488 006410; Jackson Laboratory, Bar Harbor, ME) were bred in house by mating ChAT-IRES-Cre,  
489 B6;129S6-Chattm2(cre)Lowl/J with C57BL6/J mice. CaMKII $\alpha$ -Cre mice obtained from Ronald  
490 Duman (Casanova et al., 2001; Wohleb et al., 2016) were bred in house as above. C57BL6/J  
491 mice were obtained from The Jackson Laboratory at 6-10 weeks of age, and tested at 5-7  
492 months of age, following at least one week of acclimation. All mice were maintained in a  
493 temperature-controlled animal facility on a 12-hour light/dark cycle (lights on at 7:00 AM). Mice  
494 were group housed 3-5 per cage and provided with *ad libitum* food and water until undergoing  
495 behavioral testing. Mice were single housed 1-3 weeks before surgery to facilitate food  
496 restriction and body weight maintenance.

497

### 498 **Surgical procedures**

499 Surgical procedures for behavior were performed in fully adult mice at 4-6 months of  
500 age, age-matched across conditions. For viral infusion and fiber implantation, mice were  
501 anesthetized using isoflurane (induced at 4%, maintained at 1.5-2%) and secured in a  
502 stereotactic apparatus (David Kopf Instruments, Tujunga, CA). The skull was exposed using a

503 scalpel and Bregma was determined using the syringe needle tip (2  $\mu$ L Hamilton Neuros  
504 syringe, 30 gauge needle, flat tip; Reno, NV).

505 For fiber photometry surgeries, either 0.4  $\mu$ L of AAV9 hSyn-ACh3.0 (Vigene Biosciences  
506 Inc.) to measure BLA ACh levels (**Fig. 2A-E + S2.1-S2.2**) or 0.5  $\mu$ L of AAV1 Syn-FLEX-  
507 GCaMP6s-WPRE-SV40 (Addgene, Watertown, MA) to measure BLA principal cell calcium  
508 dynamics (**Fig. 3 + S3.1-S3.2**) was delivered unilaterally to the BLA (A/P; -1.34 mm, M/L + 2.65  
509 mm, D/V -4.6 mm, relative to Bregma) of ChAT-IRES-Cre or CaMKII $\alpha$ -Cre mice, respectively, at  
510 a rate of 0.1  $\mu$ L/min. The needle was allowed to remain at the infusion site for 5 min before and  
511 5 min after injection. A mono fiber-optic cannula (1.25 mm outer diameter metal ferrule; 6 mm  
512 long, 400  $\mu$ m core diameter/430  $\mu$ m outer diameter, 0.48 numerical aperture (NA), hard polymer  
513 cladding outer layer cannula; Doric Lenses, Quebec City, Quebec, Canada) was implanted  
514 above the BLA (A/P; -1.34 mm, M/L + 2.65 mm, D/V -4.25 mm) and affixed to the skull using  
515 opaque dental cement (Parkell Inc., Edgewood, NY). Cholinergic NBM-BLA terminal fiber  
516 calcium dynamic recording (**Fig. 2F-J + S2.3-S2.4**) surgeries were performed as above except  
517 AAV1-Syn-FLEX-jGCaMP7s-WPRE (Addgene) was infused unilaterally into the NBM (A/P: - 0.7  
518 mm, M/L - 1.75 mm, D/V - 4.5 mm) of ChAT-IRES-Cre mice, with the optical fiber being placed  
519 above the ipsilateral BLA. The jRCaMP1b + ACh3.0 surgeries to simultaneously measure  
520 cholinergic NBM-BLA terminal fiber calcium dynamics and BLA ACh levels (**Fig. S2.5**) consisted  
521 of both the NBM and BLA infusions above, except AAV1 Syn-FLEX-NES-jRCaMP1b-WPRE-  
522 SV40 (Addgene) was infused the NBM of ChAT-IRES-Cre mice. The RCaMP sham mouse (**Fig.**  
523 **S2.5E,H**) was a wild-type littermate and thus had no jRCaMP1b expression.

524 Mice were allowed to recover in a cage without bedding with a microwavable heating  
525 pad underneath it until recovery before being returned to home cage. For two days following  
526 surgery, mice received 5 mg/Kg Rimadyl i.p (Zoetis Inc., Kalamazoo, MI) as postoperative care.

527 For optical stimulation experiments (**Fig. 4,6 + Fig. S4.1-S4.4 + S6.1-S6.2**), surgeries  
528 were performed as above except as follows: 0.5  $\mu$ L of control vector (AAV2 Ef1a-DIO-EYFP) or  
529 channelrhodopsin (AAV2 Ef1a-DIO-hChR2(H134R)-EYFP; University of North Carolina Gene  
530 Therapy Center Vector Core, Chapel Hill, NC) was delivered bilaterally into the NBM (A/P: - 0.7  
531 mm, M/L  $\pm$  1.75 mm, D/V - 4.5 mm) of ChAT-IRES-Cre mice. Mono fiber-optic cannulas (1.25  
532 mm outer diameter zirconia ferrule; 5 mm long, 200  $\mu$ m core diameter/245  $\mu$ m outer diameter,  
533 0.37 NA, polyimide buffer outer layer cannula; Doric Lenses) were inserted bilaterally above the  
534 basolateral amygdala (BLA, A/P; -1.22 mm, M/L  $\pm$  2.75 mm, D/V -4.25 mm). Mice were  
535 randomly assigned to EYFP or ChR2 groups, controlling for average group age.

536 For *ex vivo* electrophysiology experiments (**Fig. 4B**), the NBM was injected with DIO-  
537 ChR2-EYFP as described above, except mice were 8 weeks of age. The coronal brain slices  
538 containing the NBM were prepared after 2-4 weeks of expression. Briefly, mice were  
539 anesthetized with 1X Fatal-Plus (Vortech Pharmaceuticals, Dearborn, MI) and were perfused  
540 through their circulatory systems to cool down the brain with an ice-cold (4°C) and oxygenated  
541 cutting solution containing (mM): sucrose 220, KCl 2.5, NaH<sub>2</sub>PO<sub>4</sub> 1.23, NaHCO<sub>3</sub> 26, CaCl<sub>2</sub> 1,  
542 MgCl<sub>2</sub> 6 and glucose 10 (pH 7.3 with NaOH). Mice were then decapitated with a guillotine  
543 immediately; the brain was removed and immersed in the ice-cold (4°C) and oxygenated cutting  
544 solution to trim to a small tissue block containing the NBM. Coronal slices (300  $\mu$ m thick) were  
545 prepared with a Leica vibratome (Leica Biosystems Inc., Buffalo Grove, IL) after the tissue block  
546 was glued on the vibratome stage with Loctite 404 instant adhesive (Henkel Adhesive  
547 Technologies, Düsseldorf, Germany). After preparation, slices were maintained at room  
548 temperature (23-25 C°) in the storage chamber in the artificial cerebrospinal fluid (ACSF)  
549 (bubbled with 5% CO<sub>2</sub> and 95% O<sub>2</sub>) containing (in mM): NaCl 124, KCl 3, CaCl<sub>2</sub> 2, MgCl<sub>2</sub> 2,  
550 NaH<sub>2</sub>PO<sub>4</sub> 1.23, NaHCO<sub>3</sub> 26, glucose 10 (pH 7.4 with NaOH) for recovery and storage. Slices  
551 were transferred to the recording chamber and constantly perfused with ACSF with a perfusion

552 rate of 2 ml/min at a temperature of 33 oC for electrophysiological experiments. Cell-attached  
553 extracellular recording of action potentials was performed by attaching a glass micropipette filled  
554 with ACSF on EYFP-expressing cholinergic neurons with an input resistance of 10-20 MΩ under  
555 current clamp. Blue light (488 nm) pulse (60 ms) was applied to the recorded cells through an  
556 Olympus BX51WI microscope (Olympus, Waltham, MA) under the control of the Sutter filter  
557 wheel shutter controller (Lambda 10-2, Sutter Instrument, Novato, CA). All data were sampled  
558 at 3-10 kHz, filtered at 3 kHz and analyzed with an Apple Macintosh computer using Axograph  
559 X (AxoGraph). Events of field action potentials were detected and analyzed with an algorithm in  
560 Axograph X as reported previously (Rao et al., 2008).

561

## 562 **Behavioral Testing**

### 563 *Habituation*

564 One week after surgery, mice were weighed daily and given sufficient food (2018S  
565 standard chow, Envigo, Madison, WI) to maintain 85% free-feeding body weight. All behavioral  
566 tests were performed during the light cycle. Mice were allowed to acclimate to the behavioral  
567 room for 30 min before testing and were returned to the animal colony after behavioral sessions  
568 ended.

569 Two weeks after surgery, mice were handled 3 min per day for 7 days in the behavioral  
570 room. Mice were given free access to the reward (Ensure<sup>®</sup>Plus Vanilla Nutrition Shake solution  
571 mixed with equal parts water (Ensure); Abbott Laboratories, Abbott Park, IL) in a 50 mL conical  
572 tube cap in their home cages on the last 3 days of handling to familiarize them to the novel  
573 solution. Mice were also habituated to patch cord attachment during the last 3 days of handling  
574 for optical stimulation and fiber photometry experiments. Immediately before training each day,

575 a patch cord was connected to their optical fiber(s) via zirconia sleeve (s) (1.25 mm, Doric  
576 Lenses) before being placed in the behavioral chamber.

### 577 ***Operant Training***

578 All operant training was carried out using Med Associates modular test chambers and  
579 accessories (ENV-307A; Med Associates Inc., Georgia, VT). For optical stimulation  
580 experiments, test chambers were housed in sound attenuating chambers (ENV-022M). Two  
581 nose poke ports (ENV-313-M) were placed on the left wall of the chamber and the reward  
582 receptacle (ENV-303LPHD-RL3) was placed on the right wall. The receptacle cup spout was  
583 connected to a 5 mL syringe filled with Ensure loaded in a single speed syringe pump (PHM-  
584 100). Nose pokes and receptacle entries were detected by infrared beam breaks. The tone  
585 generator (ENV-230) and speaker (ENV-224BM) were placed outside the test chamber, but  
586 within the sound attenuating chamber, to the left. The house light (used for timeout, ENV-315M)  
587 was placed on top of the tone generator to avoid snagging patch cords. Each chamber had a  
588 fan (ENV-025F28) running throughout the session for ventilation and white noise. Behavior  
589 chambers were connected to a computer running MEDPC IV to collect event frequency and  
590 timestamps. For optical stimulation experiments, a hole drilled in the top of the sound  
591 attenuating chambers allowed the patch cord to pass through. BLA ACh3.0 (**Fig. 2A-E**) and  
592 principal cell GCaMP6s (**Fig. 3**) fiber photometry recordings occurred in a darkened behavioral  
593 room outside of sound attenuating chambers due to steric constraints with rigid fiber photometry  
594 patch cords. Later behavioral chamber customization allowed NBM-BLA terminal fiber (**Fig. 2F-**  
595 **J**) and jRCaMP1b/ACh3.0 (**Fig. S2.5**) mice to be tested inside sound attenuating chambers. For  
596 fiber photometry experiments, a custom receptacle was 3D printed that extended the cup  
597 beyond the chamber wall to allow mice to retrieve the reward with more rigid patch cords. In  
598 addition, the modular test chamber lid was removed and the wall height was extended with 3D  
599 printed and laser cut acrylic panels to prevent escape. Each mouse was pseudo-randomly

600 assigned to behavioral chamber when multiple chambers were used, counterbalancing for  
601 groups across boxes.

602 Three weeks after surgery, initial behavioral shaping consisted of one 35 min session of  
603 Free Reward to demonstrate the location of reward delivery; all other sessions were 30 mins.  
604 During Free Reward shaping, only the reward receptacle was accessible. After 5 min of  
605 habituation, Ensure (24  $\mu$ L over 2 seconds) was delivered in the receptacle cup and a light was  
606 turned on above the receptacle. The receptacle light was turned off upon receptacle entry. The  
607 next phase of shaping, mice learned to nose poke to receive reward on a fixed-ratio one (FR1)  
608 schedule of reinforcement. Mice in experiments involving manipulations (optical stimulation and  
609 antagonist studies) were pseudo-randomly assigned to left or right active (reinforced) nose poke  
610 port. Mice in fiber photometry experiments were all assigned to right active port to minimize  
611 potential across subject variability. The inactive (unreinforced) port served as a locomotor  
612 control. During FR1 Shaping, each nose poke response into the active port resulted in  
613 receptacle light and reward delivery. After the mice reached criterion on FR1 Shaping (group  
614 average of 30 rewards for 2 consecutive days, usually 4-5 days), mice were advanced to the  
615 Pre-Training phase. This phase incorporated an auditory tone (2.5-5 kHz, ~60 dB) that lasted  
616 for at most 10 seconds and signaled when active nose pokes would be rewarded. Only active  
617 nose pokes made during the 10 sec auditory tone (correct nose pokes) resulted in reward and  
618 receptacle light delivery. The tone co-terminated with Ensure delivery. During Pre-Training,  
619 there was no consequence for improper nose pokes, neither in the active port outside the tone  
620 (incorrect nose pokes) nor in the inactive port (inactive nose pokes). The number of inactive  
621 nose pokes were typically very low after shaping and were not included in analysis. After reward  
622 retrieval (receptacle entry following reward delivery) the receptacle light was turned off and the  
623 tone was presented again on a variable intertrial interval schedule with an average interval of 30  
624 sec (VI 30), ranging from 10 to 50 sec (Ambroggi et al., 2008). After 4-5 days of tone training,

625 mice progressed to the Training phase, which had the same contingency as Pre-Training except  
626 incorrect nose pokes resulted in a 5 sec timeout signaled by house light illumination, followed by  
627 a restarting of the previous intertrial interval. Extinction was identical to Training except no  
628 Ensure was delivered in response to correct nose pokes. In order to promote task acquisition,  
629 mice that were not increasing number of rewards earned reliably were moved to a VI 20  
630 schedule after 9 days of VI 30 Training for BLA ACh3.0 or 6-7 days for BLA principal cell mice.  
631 The VI 20 schedule was only needed for the two groups that were trained outside of the sound  
632 attenuating chambers.

633           Between mice, excrement was removed from the chambers with a paper towel. At the  
634 end of the day chambers were cleaned with Rescue Disinfectant (Virox Animal Health, Oakville,  
635 Ontario, Canada) and Ensure syringe lines were flushed with water then air. Mice were  
636 excluded from analyses if a behavioral chamber malfunctioned (e.g. syringe pump failed) or  
637 they received the improper compound. Fiber photometry mice were excluded from analyses if  
638 they did not meet the acquisition criterion by the last day of Training.

### 639 ***Optical Stimulation***

640           Optical stimulation was generated by a 473 nm diode-pumped solid-state continuous  
641 wave laser (Opto Engine LLC, Midvale, UT) controlled by a TTL adapter (SG-231, Med  
642 Associates Inc.). The laser was connected to a fiber optic rotary joint (Doric Lenses) via a mono  
643 fiber optic patch cord (200  $\mu\text{m}$  core, 220  $\mu\text{m}$  cladding, 0.53 NA, FC connectors; Doric Lenses).  
644 The rotary joint was suspended above the sound attenuating chamber with a connected  
645 branching fiber optic patch cord (200  $\mu\text{m}$  core, 220  $\mu\text{m}$  cladding, 0.53 NA, FC connector with  
646 metal ferrule; Doric Lenses) fed into the behavioral box. Laser power was adjusted to yield 10-  
647 12 mW of power at each fiber tip. The stimulation pattern was 25 ms pulses at 20 Hz for 2  
648 seconds modified from parameters in (Jiang et al., 2016). Optical stimulation was only delivered  
649 during the Pre-Training and Training phases of the operant task. Both control (EYFP) and



650 experimental (Chr2) groups received identical light delivery, and stimulation was triggered by a  
651 correct nose poke and co-terminated with the auditory tone and Ensure delivery. For the Yoked  
652 non-contingent experiment, the number of light stimulations was yoked to the concurrently  
653 running Chr2 mouse. The timing of the non-contingent yoked stimulation was explicitly  
654 unpaired with correct nose pokes or tones, and was held in queue until the mouse had not  
655 made a response in the last 2 sec, a tone was not going to be delivered within the next 2 sec, or  
656 at least 5 sec had passed since the mouse entered the receptacle after earning reward.

657

## 658 **Fiber Photometry**

### 659 ***Acquisition***

660 Fluorescent measurements of ACh and calcium levels were recorded using two Doric  
661 Lenses 1-site Fiber Photometry Systems: a standard 405/465 nm system and a 405/465/560  
662 nm system. The standard 405/465 system was configured as follows: the fiber photometry  
663 console controlled the two connectorized LEDs (CLEDs, 405 nm modulated at 208.616 Hz and  
664 465 nm modulated at 572.205 Hz) through the LED module driver. Each CLED was connected  
665 via attenuating patch cord to the five-port Fluorescence MiniCube (FMC5\_AE(405)\_AF(420-  
666 450)\_E1(460-490)\_F1(500-550)\_S). A pigtailed fiber optic rotary joint was connected to the  
667 MiniCube and suspended above the behavioral chamber with a rotary joint holder in order to  
668 deliver and receive light through the implanted optical fiber. The other end of the rotary joint was  
669 connected to the mono fiber optic patch cord via M3 connector and attached with a zirconia  
670 sleeve to the implanted fiber optic as above. The F1 (500-550 nm) port of the MiniCube was  
671 connected to the photoreceiver (AC low mode, New Focus 2151 Visible Femtowatt  
672 Photoreceiver, New Focus, San Jose, CA) via a fiber optic adapter (Doric Lenses) that was  
673 finally connected back to the fiber photometry console through an analog port. The 405/465/560

674 nm system was set up similarly, except a 560 nm LED was incorporated (modulated at 333.786  
675 Hz), a six-port MiniCube with two integrated photodetector heads was used (iFMC6\_IE(400-  
676 410)\_E1(460-490)\_F1(500-540)\_E2(555-570)\_F2(580-680)\_S), and Doric Fluorescence  
677 Detector Amplifiers were used (AC 1X or 10X mode, DFD\_FOA\_FC). A TTL adapter (SG-231,  
678 Med Associates Inc.) was connected to the digital input/output port to allow for timestamping  
679 when events occurred in the behavioral chamber. Signal was recorded using Doric  
680 Neuroscience Studio (V 5.3.3.14) via the Lock-In demodulation mode with a sampling rate of  
681 12.0 kS/s. Data were decimated by a factor of 100 and saved as a comma-separated file.

## 682 **Analysis**

683 Preprocessing of raw data was performed using a modified version of a MATLAB  
684 (MathWorks, Natick, MA) script provided by Doric. The baseline fluorescence ( $F_0$ ) was  
685 calculated using a first order least mean squares regression over the ~30 min recording  
686 session. Second order least mean squares regressions were used when photobleaching of the  
687 sensor was more pronounced, as in the case of NBM-BLA terminal fiber recordings. The  
688 change in fluorescence for a given timepoint ( $\Delta F$ ) was calculated as the difference between it  
689 and  $F_0$ , divided by  $F_0$ , which was multiplied by 100 to yield %  $\Delta F/F_0$ . The %  $\Delta F/F_0$  was  
690 calculated independently for both the signal (465 nm) and reference (405 nm) channels to  
691 assess the degree of movement artifact. Since little movement artifact was observed in the  
692 recordings (**Fig. S2.1B-C, S2.3E-F, S3.1C-D**, tan lines), the signal %  $\Delta F/F_0$  was analyzed  
693 alone. The %  $\Delta F/F_0$  was z-scored to give the final Z %  $\Delta F/F_0$  reported here. For the BLA  
694 principal cell recordings (**Fig. S3.1C-D**), some mirroring of the signal channel observed in the  
695 reference channel. This is likely because 405 nm is not the “true” isosbestic point for GCaMP  
696 and we were instead measuring some changes in calcium-unbound GCaMP rather than  
697 calcium-insensitive GCaMP signal alone (Barnett et al., 2017; C. K. Kim et al., 2016; Sych et al.,

698 2019). Graphs and heatmaps for averaged traces aligned to actions were based on licking bout  
699 epoch filtering code from TDT (Alachua, FL; link in code comments).

## 700 ***Heatmaps***

701 Combined action heatmaps were generated in MATLAB (2019b) by analyzing data 5 sec  
702 preceding tone onset (rewarded trials only) to 5 sec after receptacle entry. Actions were aligned  
703 despite variable latencies by evenly splitting a maximum of 4 sec post-tone onset/pre-correct  
704 nose poke and 1 sec post-correct nose poke/pre-receptacle entry for each trial within a day. The  
705 resulting aligned trials were averaged to generate daily averages that made up the rows of the  
706 individual animal heatmaps. Blanks in the rows of heatmaps (black time bins) indicate time bins  
707 added for alignment, meaning that no trials for that day had a latency that stretched the entire  
708 window. Only rewarded trials where the mouse entered the receptacle within 5 sec after nose  
709 poke were analyzed. Full or partial training days were excluded from analysis if there were  
710 acquisition issues such as the patch cord losing contact with the fiber or behavioral apparatus  
711 malfunction. Lack of trials for analysis or recording issues led to missing rows of fiber  
712 photometry data in the heatmap despite having behavioral data, in which case these rows were  
713 skipped rather than adding entire blank rows. Due to individual differences in behavior, across-  
714 mouse average data was calculated by using a selection of days in which behavior was roughly  
715 similar or milestones such as first and last day of Pre-Training, first day earning 10 rewards in  
716 Training, first day crossing acquisition threshold (and maintaining afterward), last day of  
717 Training, last day of Extinction (with 4 or more rewarded trials that met analysis criteria).  
718 Additional days were included in across-mouse average heatmaps when possible. Incorrect  
719 nose poke heatmaps were generated by averaging signals for 5 sec before and 5 sec after  
720 incorrect nose pokes that were not preceded by an incorrect nose poke in the last 5 sec. The  
721 incorrect nose poke heatmaps averaged across mice were generated using the same selection  
722 of days as the combined action heatmaps for a given experiment.

723 **Pharmacology**

724 Male wildtype C57BL/6J mice were injected i.p. 30 min prior to each Pre-Training and  
725 Training session with a volume of 10 mL/kg with the following compounds: 1X DPBS (Thermo  
726 Fisher Scientific, Waltham, MA), 1 mg/kg mecamylamine hydrochloride (Millipore Sigma, St.  
727 Louis, MO), 0.5 mg/kg (-) scopolamine hydrochloride (Millipore Sigma), or 1 mg/kg  
728 mecamylamine + 0.5 mg/kg scopolamine (**Fig. 5 + Fig. S5.1**)

729

730 **Histology**

731 After completion of behavioral experiments, animals were anesthetized with 1X Fatal-  
732 Plus (Vortech Pharmaceuticals). Once there was no response to toe-pinch, mice were  
733 transcardially perfused with 20 mL ice cold 1X DPBS followed by 20 mL 4% paraformaldehyde  
734 (PFA, Electron Microscopy Sciences, Hatfield, PA). Brains were extracted and post-fixed for at  
735 least 1 day in 4% PFA at 4°C and transferred to 30% sucrose (Millipore Sigma) for at least 1  
736 day at 4°C. Brains were sliced 40 µm thick on a self-cooling microtome and stored in a 0.02%  
737 sodium azide (Millipore Sigma) PBS solution. Brain slices were washed in PBS, blocked for 2-3  
738 hours (0.3% Triton X-100, American Bioanalytical, Canton, MA; 3% normal donkey serum,  
739 Jackson ImmunoResearch, West Grove, PA), then incubated overnight with primary antibodies  
740 (1:1000 + 1% normal donkey serum). Slices were then washed in PBS and incubated with  
741 secondary antibodies (1:1000) for 2 hours, washed, stained with DAPI for 5 min, washed,  
742 mounted, and coverslipped with Fluoromount-G (Electron Microscopy Sciences). All incubations  
743 were at room temperature. Microscope slides were imaged using a FLUOVIEW FV10i confocal  
744 microscope (Olympus). Injection sites and fiber placements were designated on modified Allen  
745 Mouse Brain Atlas figures (Lein et al., 2007). Mice were excluded from analyses if fluorescence  
746 was not observed at injection sites.

747 **Antibodies used:**

748 Goat anti-ChAT (AB144P, Millipore Sigma)

749 Chicken anti-GFP (A-10262, Invitrogen, Carlsbad, CA)

750 Alexa Fluor 488 Donkey anti-Chicken (703-545-155, Jackson ImmunoResearch Inc.)

751 Alexa Fluor 555 Donkey anti-Goat (A-21432, Invitrogen)

752

753 **Statistical Analyses**

754 Operant behavioral data saved by MEDPC IV was transferred to Excel using MPC2XL.

755 Data were organized in MATLAB and analyzed in Prism (V8.3.0, GraphPad Software, San

756 Diego, CA). Differences between groups and interactions across days for Training were

757 evaluated using Two-Way Repeated Measures ANOVAs. We computed the required sample

758 size for a 90% power level with an alpha of 0.05 by estimating the control (EYFP) group mean

759 would be 10 rewards and the mean experimental (ChR2) group would be 20 rewards with a

760 standard deviation of 5. We utilized a power calculator for continuous outcomes of two

761 independent samples, assuming a normal distribution. The result was 6 samples per group.

762 Each manipulation experiment started with at least 6 mice were included in each group (*Sealed*

763 *Envelope* | *Power calculator for continuous outcome superiority trial*, n.d.). In each experiment,

764 each animal within a group served as a biological replicate. These studies did not include

765 technical replicates. Masking was not applied during data acquisition but data analyses were

766 semi-automated in MATLAB and performed blind to condition

767

768

## 769 **Supplemental Methods**

### 770 **Cued Self-Stimulation**

771 After Extinction, responding was reinstated in Training for 2 days. Then mice underwent  
772 a modified Training paradigm where correct nose pokes yielded only laser stimulation, without  
773 Ensure delivery.

### 774 **Real Time Place Preference**

775 An empty, clear mouse cage (29.5 cm x 19 cm x 12.5 cm) had half of its floor covered in  
776 printer paper to provide a distinct floor texture. A video camera was placed above the cage and  
777 was connected to a computer running EthoVision XT (version 10.1.856, Noldus, Wageningen,  
778 Netherlands) to track the position of the mouse and deliver optical stimulation when the mouse  
779 was on the laser-paired side (via TTL pulse to OTPG\_4 laser controller (Doric Lenses)  
780 connected to the laser; 20 Hz, 25 ms pulses). Mice were randomly assigned and  
781 counterbalanced to receive laser stimulation only on one side of the cage. Mice were allowed  
782 free access to either side for 15 min during a session. Baseline was established in the absence  
783 of optical stimulation on Day 1. Mice then received optical stimulation on Day 2 only when on  
784 the laser-paired side. Data are presented as percent time spent on the laser-paired side.

### 785 **Progressive Ratio testing**

786 In the progressive ratio test, mice were given 60 min to nose poke for Ensure and 2 sec  
787 of optical stimulation on a progressive ratio schedule (escalations given below). Training Day  
788 escalation: 1, 2, 2, 2, 2, 3, 3, 3, 3, 3, 5, 5, 5, 5, 5, 8, 8, 8, 8, 8, 8, 11, 11, 11, 11, 11, 11, 15, 15,  
789 15, 15, 15, 22, 22, 22, 22, 22, 33, 33, 33, 33, 33, 44, 44, 44, 44, 44, 55, 66, 77, 88, 99, 133,  
790 166, 199, 255, 313, 399, 499, 599, 777, 900, 1222. Test Day escalation: 1, 2, 4, 6, 9, 12, 15, 20,  
791 25, 32, 40, 50, 62, 77, 95, 118, 145, 178, 219, 268, 328, 402, 492, 603, 777, 900, 1222.

792 **Locomotor Activity**

793 **Optical Stimulation:** Mice were placed in a square box (47 cm x 47 cm x 21 cm) for 20 min  
794 with a floor of filter paper that was changed between mice. During the 3<sup>rd</sup> 5 min bin of the  
795 session, mice received optical stimulation (20 sec on/off, 20 Hz, 25 ms pulses). Locomotor  
796 activity was recorded via overhead camera and analyzed in 5 min bins with EthoVision.

797 **Antagonists:** Locomotor data was collected using an Accuscan Instruments (Columbus, Ohio)  
798 behavior monitoring system and software. Mice were individually tested in empty cages, with  
799 bedding and nesting material removed to prevent obstruction of infrared beams. Mice were  
800 injected (i.p.) with saline, mecamylamine (1 mg/kg, Sigma), scopolamine (0.5 mg/kg, Sigma), or  
801 mecamylamine+scopolamine (1 mg/kg and 0.5 mg/kg, respectively) 30 min before locomotor  
802 testing. Locomotion was monitored for 20 min using 13 photocells placed 4 cm apart to obtain  
803 an ambulatory activity count, consisting of the number of beam breaks recorded during a period  
804 of ambulatory activity (linear motion rather than quick, repetitive beam breaks associated with  
805 behaviors such as scratching and grooming).

806 **Light/Dark Box Exploration**

807 A rectangular box was divided evenly into a light (clear top, illuminated by an 8W tube  
808 light) and dark (black walls, black top) side with a black walled divider in the middle with a small  
809 door. The lid and divider were modified to allow the optical fiber and patch cord to pass through  
810 freely. Mice were placed facing the corner on the light side furthest from the divider and the  
811 latency to crossing to the dark side was measured. The number of crosses and time spent on  
812 each side were measured for 6 min following the initial cross.

813

814 **Acknowledgements**

815 These studies were supported by grants DA14241, DA037566, MH077681. LW, DT and PR  
816 were supported by NS022061, MH109104 from the National Institutes of Health, and by the  
817 intramural programs of NINDS and NIMH. X-BG was supported by DA046160. RBC was  
818 supported by T32-NS007224. We thank Samantha Sheppard for the use of her mouse  
819 illustration and animal care assistance and Nadia Jordan-Spasov for genotyping and laboratory  
820 help. Angela Lee, and Wenliang Zhou provided helpful input into experimental planning.  
821 Marcelo Dietrich, Eric Girardi, Usman Farooq, Onur Iyilikci, Sharif Kronemer, Matthew Pettus,  
822 and Zach Saltzman provided insightful discussion and assistance with analysis and figure  
823 design. Ralph DiLeone, Jane Taylor, and Hyojung Seo offered helpful discussion about  
824 experimental design and analysis. The support teams at Doric Lenses (Alex Côté and Olivier  
825 Dupont-Therrien) and Tucker-Davis Technologies provided discussion, analysis support, and  
826 MATLAB code assistance.

827



828 **References**

- 829 Aitta-aho, T., Hay, Y. A., Phillips, B. U., Saksida, L. M., Bussey, T. J., Paulsen, O., & Apergis-  
830 Schoute, J. (2018). Basal Forebrain and Brainstem Cholinergic Neurons Differentially  
831 Impact Amygdala Circuits and Learning-Related Behavior. *Current Biology*, 28(16),  
832 2557-2569.e4. <https://doi.org/10.1016/j.cub.2018.06.064>
- 833 Ambroggi, F., Ishikawa, A., Fields, H. L., & Nicola, S. M. (2008). Basolateral Amygdala Neurons  
834 Facilitate Reward-Seeking Behavior by Exciting Nucleus Accumbens Neurons. *Neuron*,  
835 59(4), 648–661. <https://doi.org/10.1016/j.neuron.2008.07.004>
- 836 Barnett, L. M., Hughes, T. E., & Drobizhev, M. (2017). Deciphering the molecular mechanism  
837 responsible for GCaMP6m's Ca<sup>2+</sup>-dependent change in fluorescence. *PLOS ONE*,  
838 12(2), e0170934. <https://doi.org/10.1371/journal.pone.0170934>
- 839 Baxter, M. G., & Murray, E. A. (2002). The amygdala and reward. *Nature Reviews*  
840 *Neuroscience*, 3(7), 563. <https://doi.org/10.1038/nrn875>
- 841 Baysinger, A. N., Kent, B. A., & Brown, T. H. (2012). Muscarinic Receptors in Amygdala Control  
842 Trace Fear Conditioning. *PLOS ONE*, 7(9), e45720.  
843 <https://doi.org/10.1371/journal.pone.0045720>
- 844 Cador, M., Robbins, T. W., & Everitt, B. J. (1989). Involvement of the amygdala in stimulus-  
845 reward associations: Interaction with the ventral striatum. *Neuroscience*, 30(1), 77–86.
- 846 Casanova, E., Fehsenfeld, S., Mantamadiotis, T., Lemberger, T., Greiner, E., Stewart, A. F., &  
847 Schütz, G. (2001). A CamKII $\alpha$  iCre BAC allows brain-specific gene inactivation. *Genesis*,  
848 31(1), 37–42. <https://doi.org/10.1002/gene.1078>
- 849 Egorov, A. V., Unsicker, K., & Halbach, O. V. B. und. (2006). Muscarinic control of graded  
850 persistent activity in lateral amygdala neurons. *European Journal of Neuroscience*,  
851 24(11), 3183–3194. <https://doi.org/10.1111/j.1460-9568.2006.05200.x>

- 852 Gu, Z., & Yakel, J. L. (2011). Timing-Dependent Septal Cholinergic Induction of Dynamic  
853 Hippocampal Synaptic Plasticity. *Neuron*, 71(1), 155–165.  
854 <https://doi.org/10.1016/j.neuron.2011.04.026>
- 855 Guo, W., Robert, B., & Polley, D. B. (2019). The Cholinergic Basal Forebrain Links Auditory  
856 Stimuli with Delayed Reinforcement to Support Learning. *Neuron*, 103(6), 1164–1177.e6.  
857 <https://doi.org/10.1016/j.neuron.2019.06.024>
- 858 Hangya, B., Ranade, S. P., Lorenc, M., & Kepecs, A. (2015). Central Cholinergic Neurons Are  
859 Rapidly Recruited by Reinforcement Feedback. *Cell*, 162(5), 1155–1168.  
860 <https://doi.org/10.1016/j.cell.2015.07.057>
- 861 Janak, P. H., & Tye, K. M. (2015). From circuits to behaviour in the amygdala. *Nature*,  
862 517(7534), 284–292. <https://doi.org/10.1038/nature14188>
- 863 Jiang, L., Kundu, S., Lederman, J. D., López-Hernández, G. Y., Ballinger, E. C., Wang, S.,  
864 Talmage, D. A., & Role, L. W. (2016). Cholinergic Signaling Controls Conditioned Fear  
865 Behaviors and Enhances Plasticity of Cortical-Amygdala Circuits. *Neuron*, 90(5), 1057–  
866 1070. <https://doi.org/10.1016/j.neuron.2016.04.028>
- 867 Jing, M., Li, Y., Zeng, J., Huang, P., Skirzewski, M., Kljakic, O., Peng, W., Qian, T., Tan, K., Wu,  
868 R., Zhang, S., Pan, S., Xu, M., Li, H., Saksida, L. M., Prado, V. F., Bussey, T., Prado, M.  
869 A. M., Chen, L., ... Li, Y. (2019). *An optimized acetylcholine sensor for monitoring in vivo*  
870 *cholinergic activity* [Preprint]. Neuroscience. <https://doi.org/10.1101/861690>
- 871 Jing, M., Zhang, P., Wang, G., Feng, J., Mesik, L., Zeng, J., Jiang, H., Wang, S., Looby, J. C.,  
872 Guagliardo, N. A., Langma, L. W., Lu, J., Zuo, Y., Talmage, D. A., Role, L. W., Barrett,  
873 P. Q., Zhang, L. I., Luo, M., Song, Y., ... Li, Y. (2018). A genetically encoded fluorescent  
874 acetylcholine indicator for *in vitro* and *in vivo* studies. *Nature Biotechnology*, 36(8), 726–  
875 737. <https://doi.org/10.1038/nbt.4184>
- 876 Kim, C. K., Yang, S. J., Pichamoorthy, N., Young, N. P., Kauvar, I., Jennings, J. H., Lerner, T.  
877 N., Berndt, A., Lee, S. Y., Ramakrishnan, C., Davidson, T. J., Inoue, M., Bito, H., &

- 878 Deisseroth, K. (2016). Simultaneous fast measurement of circuit dynamics at multiple  
879 sites across the mammalian brain. *Nature Methods*, 13(4), 325–328.  
880 <https://doi.org/10.1038/nmeth.3770>
- 881 Kim, J., Pignatelli, M., Xu, S., Itohara, S., & Tonegawa, S. (2016). Antagonistic negative and  
882 positive neurons of the basolateral amygdala. *Nature Neuroscience*.  
883 <https://doi.org/10.1038/nn.4414>
- 884 LeDoux, J. E., Cicchetti, P., Xagoraris, A., & Romanski, L. M. (1990). The lateral amygdaloid  
885 nucleus: Sensory interface of the amygdala in fear conditioning. *Journal of*  
886 *Neuroscience*, 10(4), 1062–1069.
- 887 Lein, E. S., Hawrylycz, M. J., Ao, N., Ayres, M., Bensinger, A., Bernard, A., Boe, A. F., Boguski,  
888 M. S., Brockway, K. S., Byrnes, E. J., Chen, L., Chen, L., Chen, T.-M., Chi Chin, M.,  
889 Chong, J., Crook, B. E., Czaplinska, A., Dang, C. N., Datta, S., ... Jones, A. R. (2007).  
890 Genome-wide atlas of gene expression in the adult mouse brain. *Nature*, 445(7124),  
891 168–176. <https://doi.org/10.1038/nature05453>
- 892 Lutas, A., Kucukdereli, H., Alturkistani, O., Carty, C., Sugden, A. U., Fernando, K., Diaz, V.,  
893 Flores-Maldonado, V., & Andermann, M. L. (2019). State-specific gating of salient cues  
894 by midbrain dopaminergic input to basal amygdala. *Nature Neuroscience*, 22(11), 1820–  
895 1833. <https://doi.org/10.1038/s41593-019-0506-0>
- 896 McIntyre, C. K., Ragozzino, M. E., & Gold, P. E. (1998). Intra-amygdala infusions of  
897 scopolamine impair performance on a conditioned place preference task but not a  
898 spatial radial maze task. *Behavioural Brain Research*, 95(2), 219–226.  
899 [https://doi.org/10.1016/S0166-4328\(97\)00161-7](https://doi.org/10.1016/S0166-4328(97)00161-7)
- 900 McKernan, M. G., & Shinnick-Gallagher, P. (1997). Fear conditioning induces a lasting  
901 potentiation of synaptic currents in vitro. *Nature*, 390(6660), 607–611.  
902 <https://doi.org/10.1038/37605>

- 903 Picciotto, M. R., Higley, M. J., & Mineur, Y. S. (2012). Acetylcholine as a Neuromodulator:  
904 Cholinergic Signaling Shapes Nervous System Function and Behavior. *Neuron*, 76(1),  
905 116–129. <https://doi.org/10.1016/j.neuron.2012.08.036>
- 906 Rao, Y., Lu, M., Ge, F., Marsh, D. J., Qian, S., Wang, A. H., Picciotto, M. R., & Gao, X.-B.  
907 (2008). Regulation of Synaptic Efficacy in Hypocretin/Orexin-Containing Neurons by  
908 Melanin Concentrating Hormone in the Lateral Hypothalamus. *The Journal of*  
909 *Neuroscience*, 28(37), 9101–9110. <https://doi.org/10.1523/JNEUROSCI.1766-08.2008>
- 910 Rogan, M. T., Stäubli, U. V., & LeDoux, J. E. (1997). Fear conditioning induces associative long-  
911 term potentiation in the amygdala. *Nature*, 390(6660), 604–607.  
912 <https://doi.org/10.1038/37601>
- 913 Sanghera, M. K., Rolls, E. T., & Roper-Hall, A. (1979). Visual responses of neurons in the  
914 dorsolateral amygdala of the alert monkey. *Experimental Neurology*, 63(3), 610–626.  
915 [https://doi.org/10.1016/0014-4886\(79\)90175-4](https://doi.org/10.1016/0014-4886(79)90175-4)
- 916 Sarter, M., & Lustig, C. (2020). Forebrain Cholinergic Signaling: Wired and Phasic, Not Tonic,  
917 and Causing Behavior. *Journal of Neuroscience*, 40(4), 712–719.  
918 <https://doi.org/10.1523/JNEUROSCI.1305-19.2019>
- 919 Schoenbaum, G., Chiba, A. A., & Gallagher, M. (1998). Orbitofrontal cortex and basolateral  
920 amygdala encode expected outcomes during learning. *Nature Neuroscience*, 1(2), 155–  
921 159. <https://doi.org/10.1038/407>
- 922 Schultz, W. (1998). Predictive Reward Signal of Dopamine Neurons. *Journal of*  
923 *Neurophysiology*, 80(1), 1–27.
- 924 Schultz, W., Dayan, P., & Montague, P. R. (1997). A Neural Substrate of Prediction and  
925 Reward. *Science*, 275(5306), 1593–1599.  
926 <https://doi.org/10.1126/science.275.5306.1593>
- 927 *Sealed Envelope | Power calculator for continuous outcome superiority trial*. (n.d.). Retrieved  
928 October 10, 2016, from <https://www.sealedenvelope.com/power/continuous-superiority/>

- 929 Sengupta, A., Yau, J. O. Y., Jean-Richard-Dit-Bressel, P., Liu, Y., Millan, E. Z., Power, J. M., &  
930 McNally, G. P. (2018). Basolateral Amygdala Neurons Maintain Aversive Emotional  
931 Saliency. *Journal of Neuroscience*, *38*(12), 3001–3012.  
932 <https://doi.org/10.1523/JNEUROSCI.2460-17.2017>
- 933 Sturgill, J. F., Hegedus, P., Li, S. J., Chevy, Q., Siebels, A., Jing, M., Li, Y., Hangya, B., &  
934 Kepecs, A. (2020). Basal forebrain-derived acetylcholine encodes valence-free  
935 reinforcement prediction error. *BioRxiv*, 2020.02.17.953141.  
936 <https://doi.org/10.1101/2020.02.17.953141>
- 937 Sych, Y., Chernysheva, M., Sumanovski, L. T., & Helmchen, F. (2019). High-density multi-fiber  
938 photometry for studying large-scale brain circuit dynamics. *Nature Methods*, *16*(6), 553–  
939 560. <https://doi.org/10.1038/s41592-019-0400-4>
- 940 Tye, K. M., & Janak, P. H. (2007). Amygdala Neurons Differentially Encode Motivation and  
941 Reinforcement. *Journal of Neuroscience*, *27*(15), 3937–3945.  
942 <https://doi.org/10.1523/JNEUROSCI.5281-06.2007>
- 943 Tye, K. M., Stuber, G. D., de Ridder, B., Bonci, A., & Janak, P. H. (2008). Rapid strengthening  
944 of thalamo-amygdala synapses mediates cue–reward learning. *Nature*, *453*(7199),  
945 1253–1257. <https://doi.org/10.1038/nature06963>
- 946 Unal, C. T., Pare, D., & Zaborszky, L. (2015). Impact of Basal Forebrain Cholinergic Inputs on  
947 Basolateral Amygdala Neurons. *Journal of Neuroscience*, *35*(2), 853–863.  
948 <https://doi.org/10.1523/JNEUROSCI.2706-14.2015>
- 949 Wohleb, E. S., Wu, M., Gerhard, D. M., Taylor, S. R., Picciotto, M. R., Alreja, M., & Duman, R.  
950 S. (2016). GABA interneurons mediate the rapid antidepressant-like effects of  
951 scopolamine. *The Journal of Clinical Investigation*, *126*(7), 2482–2494.  
952 <https://doi.org/10.1172/JCI85033>
- 953 Woolf, N. J. (1991). Cholinergic systems in mammalian brain and spinal cord. *Progress in*  
954 *Neurobiology*, *37*(6), 475–524. [https://doi.org/10.1016/0301-0082\(91\)90006-M](https://doi.org/10.1016/0301-0082(91)90006-M)

- 955 Zaborszky, L., van den Pol, A., & Gyengesi, E. (2012). The Basal Forebrain Cholinergic  
956 Projection System in Mice. In *The Mouse Nervous System* (pp. 684–718). Elsevier.  
957 <https://doi.org/10.1016/B978-0-12-369497-3.10028-7>
- 958 Aitta-aho, T., Hay, Y. A., Phillips, B. U., Saksida, L. M., Bussey, T. J., Paulsen, O., & Apergis-  
959 Schoute, J. (2018). Basal Forebrain and Brainstem Cholinergic Neurons Differentially  
960 Impact Amygdala Circuits and Learning-Related Behavior. *Current Biology*, 28(16),  
961 2557-2569.e4. <https://doi.org/10.1016/j.cub.2018.06.064>
- 962 Ambroggi, F., Ishikawa, A., Fields, H. L., & Nicola, S. M. (2008). Basolateral Amygdala Neurons  
963 Facilitate Reward-Seeking Behavior by Exciting Nucleus Accumbens Neurons. *Neuron*,  
964 59(4), 648–661. <https://doi.org/10.1016/j.neuron.2008.07.004>
- 965 Barnett, L. M., Hughes, T. E., & Drobizhev, M. (2017). Deciphering the molecular mechanism  
966 responsible for GCaMP6m's Ca<sup>2+</sup>-dependent change in fluorescence. *PLOS ONE*,  
967 12(2), e0170934. <https://doi.org/10.1371/journal.pone.0170934>
- 968 Baxter, M. G., & Murray, E. A. (2002). The amygdala and reward. *Nature Reviews*  
969 *Neuroscience*, 3(7), 563. <https://doi.org/10.1038/nrn875>
- 970 Baysinger, A. N., Kent, B. A., & Brown, T. H. (2012). Muscarinic Receptors in Amygdala Control  
971 Trace Fear Conditioning. *PLOS ONE*, 7(9), e45720.  
972 <https://doi.org/10.1371/journal.pone.0045720>
- 973 Cador, M., Robbins, T. W., & Everitt, B. J. (1989). Involvement of the amygdala in stimulus-  
974 reward associations: Interaction with the ventral striatum. *Neuroscience*, 30(1), 77–86.
- 975 Casanova, E., Fehsenfeld, S., Mantamadiotis, T., Lemberger, T., Greiner, E., Stewart, A. F., &  
976 Schütz, G. (2001). A CamKII $\alpha$  iCre BAC allows brain-specific gene inactivation. *Genesis*,  
977 31(1), 37–42. <https://doi.org/10.1002/gene.1078>
- 978 Egorov, A. V., Unsicker, K., & Halbach, O. V. B. und. (2006). Muscarinic control of graded  
979 persistent activity in lateral amygdala neurons. *European Journal of Neuroscience*,  
980 24(11), 3183–3194. <https://doi.org/10.1111/j.1460-9568.2006.05200.x>

- 981 Gu, Z., & Yakel, J. L. (2011). Timing-Dependent Septal Cholinergic Induction of Dynamic  
982 Hippocampal Synaptic Plasticity. *Neuron*, 71(1), 155–165.  
983 <https://doi.org/10.1016/j.neuron.2011.04.026>
- 984 Guo, W., Robert, B., & Polley, D. B. (2019). The Cholinergic Basal Forebrain Links Auditory  
985 Stimuli with Delayed Reinforcement to Support Learning. *Neuron*, 103(6), 1164–1177.e6.  
986 <https://doi.org/10.1016/j.neuron.2019.06.024>
- 987 Hangya, B., Ranade, S. P., Lorenc, M., & Kepecs, A. (2015). Central Cholinergic Neurons Are  
988 Rapidly Recruited by Reinforcement Feedback. *Cell*, 162(5), 1155–1168.  
989 <https://doi.org/10.1016/j.cell.2015.07.057>
- 990 Janak, P. H., & Tye, K. M. (2015). From circuits to behaviour in the amygdala. *Nature*,  
991 517(7534), 284–292. <https://doi.org/10.1038/nature14188>
- 992 Jiang, L., Kundu, S., Lederman, J. D., López-Hernández, G. Y., Ballinger, E. C., Wang, S.,  
993 Talmage, D. A., & Role, L. W. (2016). Cholinergic Signaling Controls Conditioned Fear  
994 Behaviors and Enhances Plasticity of Cortical-Amygdala Circuits. *Neuron*, 90(5), 1057–  
995 1070. <https://doi.org/10.1016/j.neuron.2016.04.028>
- 996 Jing, M., Li, Y., Zeng, J., Huang, P., Skirzewski, M., Kljakic, O., Peng, W., Qian, T., Tan, K., Wu,  
997 R., Zhang, S., Pan, S., Xu, M., Li, H., Saksida, L. M., Prado, V. F., Bussey, T., Prado, M.  
998 A. M., Chen, L., ... Li, Y. (2019). *An optimized acetylcholine sensor for monitoring in vivo*  
999 *cholinergic activity* [Preprint]. Neuroscience. <https://doi.org/10.1101/861690>
- 1000 Jing, M., Zhang, P., Wang, G., Feng, J., Mesik, L., Zeng, J., Jiang, H., Wang, S., Looby, J. C.,  
1001 Guagliardo, N. A., Langma, L. W., Lu, J., Zuo, Y., Talmage, D. A., Role, L. W., Barrett,  
1002 P. Q., Zhang, L. I., Luo, M., Song, Y., ... Li, Y. (2018). A genetically encoded fluorescent  
1003 acetylcholine indicator for *in vitro* and *in vivo* studies. *Nature Biotechnology*, 36(8), 726–  
1004 737. <https://doi.org/10.1038/nbt.4184>
- 1005 Kim, C. K., Yang, S. J., Pichamoorthy, N., Young, N. P., Kauvar, I., Jennings, J. H., Lerner, T.  
1006 N., Berndt, A., Lee, S. Y., Ramakrishnan, C., Davidson, T. J., Inoue, M., Bito, H., &



- 1007 Deisseroth, K. (2016). Simultaneous fast measurement of circuit dynamics at multiple  
1008 sites across the mammalian brain. *Nature Methods*, 13(4), 325–328.  
1009 <https://doi.org/10.1038/nmeth.3770>
- 1010 Kim, J., Pignatelli, M., Xu, S., Itohara, S., & Tonegawa, S. (2016). Antagonistic negative and  
1011 positive neurons of the basolateral amygdala. *Nature Neuroscience*.  
1012 <https://doi.org/10.1038/nn.4414>
- 1013 LeDoux, J. E., Cicchetti, P., Xagoraris, A., & Romanski, L. M. (1990). The lateral amygdaloid  
1014 nucleus: Sensory interface of the amygdala in fear conditioning. *Journal of*  
1015 *Neuroscience*, 10(4), 1062–1069.
- 1016 Lein, E. S., Hawrylycz, M. J., Ao, N., Ayres, M., Bensinger, A., Bernard, A., Boe, A. F., Boguski,  
1017 M. S., Brockway, K. S., Byrnes, E. J., Chen, L., Chen, L., Chen, T.-M., Chi Chin, M.,  
1018 Chong, J., Crook, B. E., Czaplinska, A., Dang, C. N., Datta, S., ... Jones, A. R. (2007).  
1019 Genome-wide atlas of gene expression in the adult mouse brain. *Nature*, 445(7124),  
1020 168–176. <https://doi.org/10.1038/nature05453>
- 1021 Lutas, A., Kucukdereli, H., Alturkistani, O., Carty, C., Sugden, A. U., Fernando, K., Diaz, V.,  
1022 Flores-Maldonado, V., & Andermann, M. L. (2019). State-specific gating of salient cues  
1023 by midbrain dopaminergic input to basal amygdala. *Nature Neuroscience*, 22(11), 1820–  
1024 1833. <https://doi.org/10.1038/s41593-019-0506-0>
- 1025 McIntyre, C. K., Ragozzino, M. E., & Gold, P. E. (1998). Intra-amygdala infusions of  
1026 scopolamine impair performance on a conditioned place preference task but not a  
1027 spatial radial maze task. *Behavioural Brain Research*, 95(2), 219–226.  
1028 [https://doi.org/10.1016/S0166-4328\(97\)00161-7](https://doi.org/10.1016/S0166-4328(97)00161-7)
- 1029 McKernan, M. G., & Shinnick-Gallagher, P. (1997). Fear conditioning induces a lasting  
1030 potentiation of synaptic currents in vitro. *Nature*, 390(6660), 607–611.  
1031 <https://doi.org/10.1038/37605>



- 1032 Picciotto, M. R., Higley, M. J., & Mineur, Y. S. (2012). Acetylcholine as a Neuromodulator:  
1033 Cholinergic Signaling Shapes Nervous System Function and Behavior. *Neuron*, 76(1),  
1034 116–129. <https://doi.org/10.1016/j.neuron.2012.08.036>
- 1035 Rogan, M. T., Stäubli, U. V., & LeDoux, J. E. (1997). Fear conditioning induces associative long-  
1036 term potentiation in the amygdala. *Nature*, 390(6660), 604–607.  
1037 <https://doi.org/10.1038/37601>
- 1038 Sanghera, M. K., Rolls, E. T., & Roper-Hall, A. (1979). Visual responses of neurons in the  
1039 dorsolateral amygdala of the alert monkey. *Experimental Neurology*, 63(3), 610–626.  
1040 [https://doi.org/10.1016/0014-4886\(79\)90175-4](https://doi.org/10.1016/0014-4886(79)90175-4)
- 1041 Sarter, M., & Lustig, C. (2020). Forebrain Cholinergic Signaling: Wired and Phasic, Not Tonic,  
1042 and Causing Behavior. *Journal of Neuroscience*, 40(4), 712–719.  
1043 <https://doi.org/10.1523/JNEUROSCI.1305-19.2019>
- 1044 Schoenbaum, G., Chiba, A. A., & Gallagher, M. (1998). Orbitofrontal cortex and basolateral  
1045 amygdala encode expected outcomes during learning. *Nature Neuroscience*, 1(2), 155–  
1046 159. <https://doi.org/10.1038/407>
- 1047 Schultz, W. (1998). Predictive Reward Signal of Dopamine Neurons. *Journal of*  
1048 *Neurophysiology*, 80(1), 1–27.
- 1049 Schultz, W., Dayan, P., & Montague, P. R. (1997). A Neural Substrate of Prediction and  
1050 Reward. *Science*, 275(5306), 1593–1599.  
1051 <https://doi.org/10.1126/science.275.5306.1593>
- 1052 Sengupta, A., Yau, J. O. Y., Jean-Richard-Dit-Bressel, P., Liu, Y., Millan, E. Z., Power, J. M., &  
1053 McNally, G. P. (2018). Basolateral Amygdala Neurons Maintain Aversive Emotional  
1054 Saliency. *Journal of Neuroscience*, 38(12), 3001–3012.  
1055 <https://doi.org/10.1523/JNEUROSCI.2460-17.2017>
- 1056 Sturgill, J. F., Hegedus, P., Li, S. J., Chevy, Q., Siebels, A., Jing, M., Li, Y., Hangya, B., &  
1057 Kepecs, A. (2020). Basal forebrain-derived acetylcholine encodes valence-free

- 1058 reinforcement prediction error. *BioRxiv*, 2020.02.17.953141.  
1059 <https://doi.org/10.1101/2020.02.17.953141>
- 1060 Sych, Y., Chernysheva, M., Sumanovski, L. T., & Helmchen, F. (2019). High-density multi-fiber  
1061 photometry for studying large-scale brain circuit dynamics. *Nature Methods*, 16(6), 553–  
1062 560. <https://doi.org/10.1038/s41592-019-0400-4>
- 1063 Tye, K. M., & Janak, P. H. (2007). Amygdala Neurons Differentially Encode Motivation and  
1064 Reinforcement. *Journal of Neuroscience*, 27(15), 3937–3945.  
1065 <https://doi.org/10.1523/JNEUROSCI.5281-06.2007>
- 1066 Tye, K. M., Stuber, G. D., de Ridder, B., Bonci, A., & Janak, P. H. (2008). Rapid strengthening  
1067 of thalamo-amygdala synapses mediates cue–reward learning. *Nature*, 453(7199),  
1068 1253–1257. <https://doi.org/10.1038/nature06963>
- 1069 Unal, C. T., Pare, D., & Zaborszky, L. (2015). Impact of Basal Forebrain Cholinergic Inputs on  
1070 Basolateral Amygdala Neurons. *Journal of Neuroscience*, 35(2), 853–863.  
1071 <https://doi.org/10.1523/JNEUROSCI.2706-14.2015>
- 1072 Wohleb, E. S., Wu, M., Gerhard, D. M., Taylor, S. R., Picciotto, M. R., Alreja, M., & Duman, R.  
1073 S. (2016). GABA interneurons mediate the rapid antidepressant-like effects of  
1074 scopolamine. *The Journal of Clinical Investigation*, 126(7), 2482–2494.  
1075 <https://doi.org/10.1172/JCI85033>
- 1076 Woolf, N. J. (1991). Cholinergic systems in mammalian brain and spinal cord. *Progress in*  
1077 *Neurobiology*, 37(6), 475–524. [https://doi.org/10.1016/0301-0082\(91\)90006-M](https://doi.org/10.1016/0301-0082(91)90006-M)
- 1078 Zaborszky, L., van den Pol, A., & Gyengesi, E. (2012). The Basal Forebrain Cholinergic  
1079 Projection System in Mice. In *The Mouse Nervous System* (pp. 684–718). Elsevier.  
1080 <https://doi.org/10.1016/B978-0-12-369497-3.10028-7>

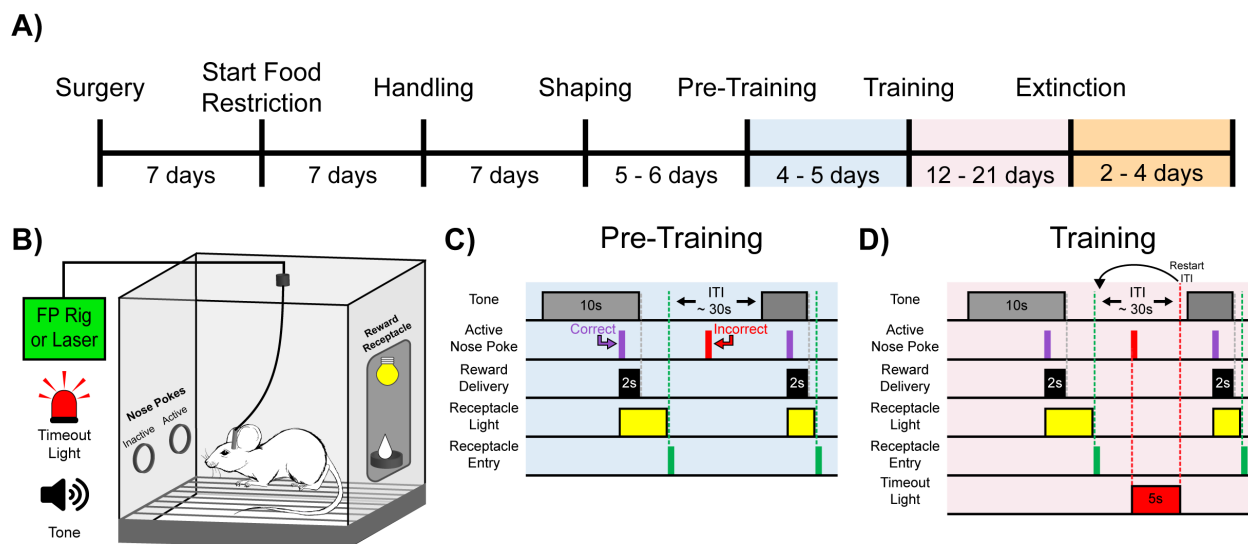

1081

1082 **Fig. 1. Experimental Timeline and Cue-Reward Learning Paradigm.**

1083 A) Experimental timeline. Mice began food restriction 7 days after surgery and were maintained  
 1084 at 85% free-feeding body weight for the duration of the experiment. After 7 days of handling, 5-6  
 1085 days of behavioral shaping prepared the mice for the cue-reward learning task (Pre-Training  
 1086 through Extinction).

1087 B) Behavioral chamber setup. Mice were placed in modular test chambers that included two  
 1088 nose poke ports on the left wall (Active and Inactive) and the Reward Receptacle on the right  
 1089 wall. A tone generator and timeout light were placed outside the modular test chamber. For fiber  
 1090 photometry (FP) and optical stimulation (Laser) experiments, mice were tethered to a patch  
 1091 cord(s).

1092 C-D) Details of the Cue-Reward Learning Paradigm C) In Pre-Training, an auditory tone was  
 1093 presented on a variable interval 30 schedule (VI30), during which an active nose poke yielded  
 1094 Ensure reward delivery but there was no consequence for incorrect nose pokes (active nose  
 1095 pokes not during tone). D) Training was identical to Pre-Training, except incorrect nose pokes  
 1096 resulted in a 5 sec timeout, signaled by timeout light illumination, followed by a restarting of the  
 1097 intertrial interval (ITI).

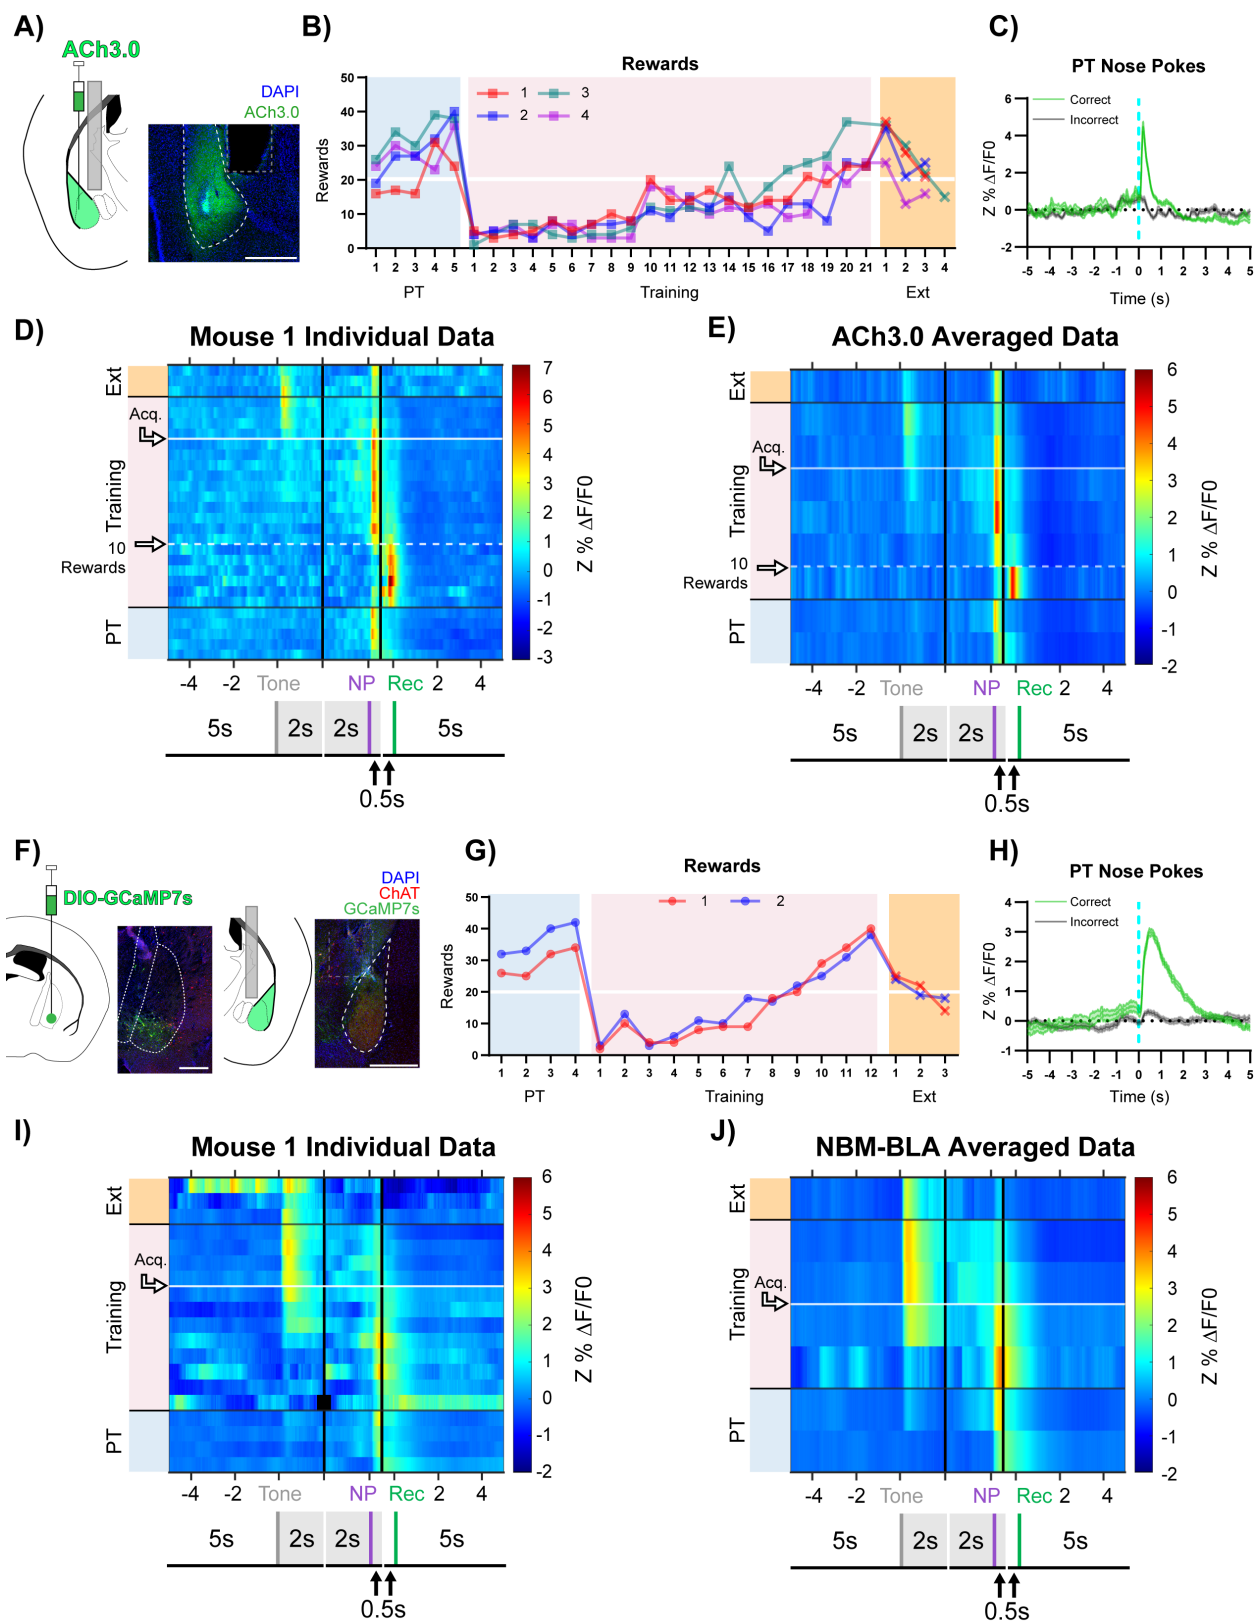

1098  
1099  
1100

**Fig. 2. Basolateral Amygdala (BLA) ACh Signaling Aligns with Salient Events During Reward Learning**

1101 A) Diagram and example of injection and fiber placement sites in the BLA for recording from  
1102 mice expressing a fluorescent acetylcholine sensor (ACh3.0). Left: Diagram of BLA ACh3.0  
1103 injection and fiber tip placement. Right: Representative coronal brain slice with fiber tip and  
1104 ACh3.0 expression. Blue: DAPI, Green: ACh3.0. White dashed line: BLA outline. Grey dashed  
1105 rectangle: fiber track. Scale = 500  $\mu$ m. Individual fiber placements are shown in **Fig. S2.1A**.

1106 B) Behavioral responding of mice expressing ACh3.0 in BLA. Individual mice acquired the task  
1107 at different rates as measured by rewards earned. Horizontal white line: acquisition threshold,  
1108 when a mouse began to earn ~20 rewards consistently in Training. Incorrect nose pokes shown  
1109 in **Fig. S2.2A**. Pre-Training (PT): blue shaded area, Training: pink shaded area, Extinction (Ext):  
1110 orange shaded area.

1111 C) Fluorescence traces from BLA of ACh3.0-expressing mice. A substantial increase in  
1112 fluorescence representing BLA ACh release coincided with correct (green line) but not incorrect  
1113 (grey line) nose pokes on last day of PT (data are shown from Mouse 1). Mean  $\pm$  SEM, correct  
1114 (n = 24), incorrect (n = 58). Traces of signal and reference channels ( $\% \Delta F/F_0$ ) during nose  
1115 pokes are shown in **Fig. S2.1B-C**. Incorrect nose pokes on last day of PT vs Training Day 1  
1116 shown in **Fig. S2.2B**.

1117 D) Heatmap of BLA ACh signaling in mouse 1 across all training phases, aligned to tone onset  
1118 (Tone), correct nose poke (NP), and receptacle entry (Rec). Each row is the average of  
1119 rewarded trials across a training session. White dashed horizontal line: first Training day earning  
1120 10 rewards. Horizontal white line: acquisition threshold, when a mouse began to earn ~20  
1121 rewards consistently in Training. Black horizontal lines: divisions between training phases. Black  
1122 vertical lines: divisions between breaks in time to allow for variable latencies in tone onset,  
1123 correct nose poke, and receptacle entry (reward retrieval). Individual data for mice 2-4 in **Fig.**  
1124 **S2.1D-F**. Incorrect nose pokes heatmaps for individual mice shown in **Fig S2.2C-F**.

1125 E) Heatmap of BLA ACh signaling averaged across mice. Signal aligned as in D) with a  
1126 selection of data from key days in the behavioral paradigm shown. From bottom to top: PT Day  
1127 1, PT Day 5, Training Day 3, First Training day earning 10 rewards (white dashed horizontal  
1128 line), Training Day 13, Training Day 15, Acquisition day (white horizontal line), Last Training  
1129 Day, Last Extinction Day. Black horizontal lines: divisions between training phases. Black  
1130 vertical lines: divisions between breaks in time to allow for variable latencies in tone onset,  
1131 correct nose poke, and receptacle entry. Incorrect nose poke heatmaps averaged across mice  
1132 shown in **Fig. S2.2G**

1133 F) Diagram and example of Nucleus Basalis of Meynert (NBM)-BLA terminal fiber recordings.  
1134 Left: DIO-GCaMP7s was injected in the NBM of ChAT-IRES-Cre mice, individual injection sites  
1135 are shown in **Fig. S2.3A**. Representative coronal brain slice showing GCaMP7s expression.  
1136 White dashed lines: internal capsule and globus pallidus outlines. Blue: DAPI, Green:  
1137 GCaMP7s, Red: ChAT. Scale = 500  $\mu\text{m}$ ; separate channels shown in **Fig. S2.3C**. Right: An  
1138 optical fiber was implanted above the ipsilateral BLA, individual fiber placements are shown in  
1139 **Fig. S2.3B**. Representative coronal brain slice showing GCaMP7 expression and fiber tip  
1140 placement. White dashed line: BLA outline. Grey dashed rectangle: fiber tract. Blue: DAPI,  
1141 Green: GCaMP7s, Red: ChAT. Scale = 500  $\mu\text{m}$ ; separate channels shown in **Fig. S2.3D**.

1142 G) Behavioral responding of mice during NBM-BLA terminal fiber recordings. Individual mice  
1143 acquired the task at different rates as measured by rewards earned. White horizontal line:  
1144 acquisition threshold, when a mouse began to earn ~20 rewards consistently in Training.  
1145 Incorrect nose pokes shown in **Fig. S2.4A**.

1146 H) NBM-BLA terminal fiber activity is similar to ACh3.0 recordings. NBM-BLA terminal fiber  
1147 activity coincided with correct (green line) but not incorrect (grey line) nose pokes on last day of  
1148 PT (data shown for Mouse 1). Mean  $\pm$  SEM, correct (n = 42), incorrect (n = 101). Signal and  
1149 reference channels ( $\% \Delta F/F_0$ ) during nose pokes are shown in **Fig. S2.3E-F**. Incorrect nose

1150 pokes on last day of PT vs Training Day 1 shown in **Fig. S2.4B**. See **Fig. S2.5A-H** for ACh3.0  
1151 and NBM-BLA terminal fiber recordings in the same mouse.

1152 I) Heatmap of NBM-BLA terminal fiber activity in mouse 1 across all training phases, aligned to  
1153 tone onset (Tone), correct nose poke (NP), and receptacle entry (Rec). Each row is the average  
1154 of rewarded trials across a training session. Horizontal white line: acquisition threshold, when a  
1155 mouse began to earn ~20 rewards consistently in Training. Black horizontal lines: divisions  
1156 between training phases. Black vertical lines: divisions between breaks in time to allow for  
1157 variable latencies in tone onset, correct nose poke, and receptacle entry (reward retrieval).  
1158 Blanks in the heatmaps indicate time bins added for alignment. Mouse 2 individual data shown  
1159 in **Fig. S2.3G**. Incorrect nose pokes heatmaps for individual mice shown in **Fig S2.4C-D**.

1160 J) Heatmap of NBM-BLA terminal fiber activity averaged across mice. Signal aligned as in D-E)  
1161 with a selection of key days shown, from bottom to top: PT Day 1, PT Day 4, Training Day 3,  
1162 Training Day 6, Acquisition day (white horizontal line), Last Training Day, Last Extinction Day.  
1163 Black horizontal lines: divisions between training phases. Black vertical lines: divisions between  
1164 breaks in time to allow for variable latencies in tone onset, correct nose poke, and receptacle  
1165 entry (reward retrieval). Incorrect nose poke heatmaps averaged across mice shown in **Fig.**  
1166 **S2.4E**.

1167

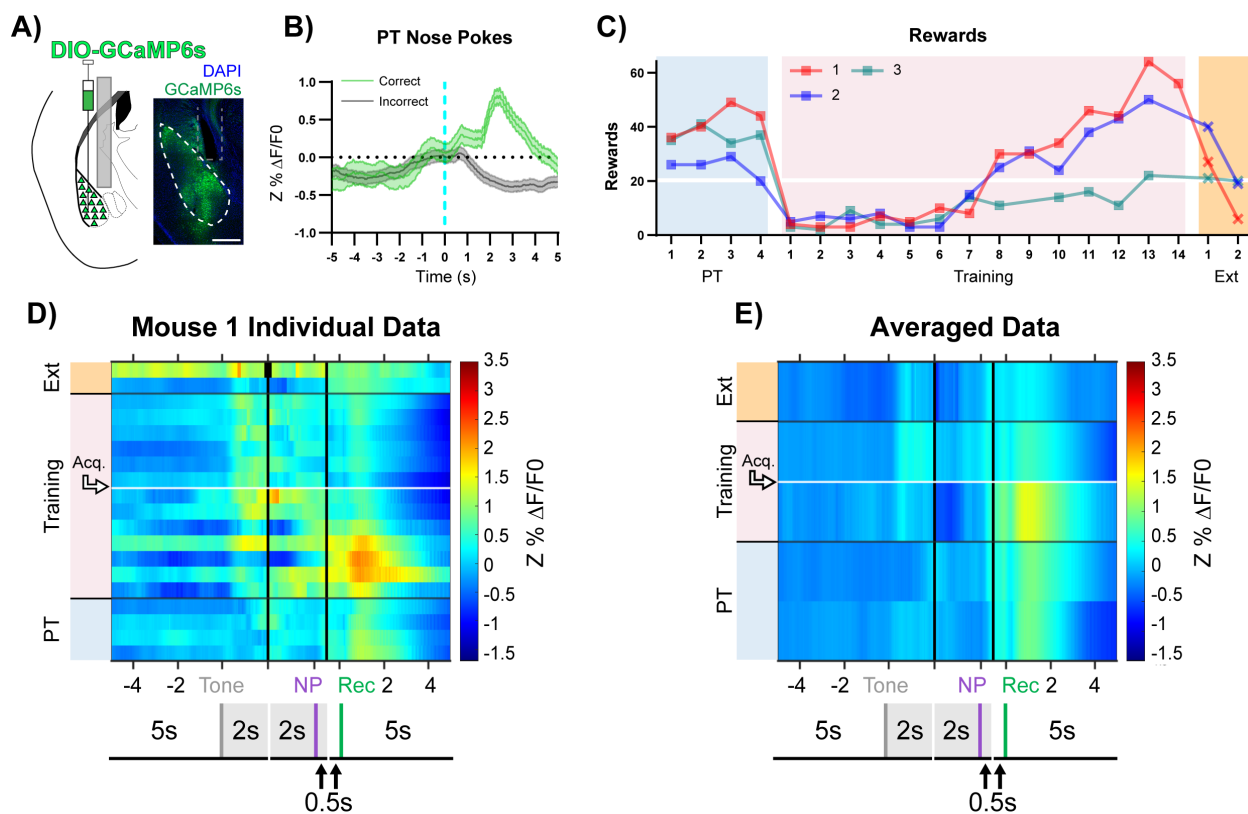

1168

1169 **Fig. 3. BLA Principal Neuron Activity Aligns to Reward Retrieval and Cue-Reward**

1170 **Learning**

1171 A) Diagram and example of injection and fiber placement sites in the BLA for recording from  
 1172 CaMKII $\alpha$ -Cre mice expressing a fluorescent calcium indicator (DIO-GCaMP6s). Left: Diagram of  
 1173 injection and fiber placement. Right: Representative coronal brain slice with fiber tip and  
 1174 GCaMP6s expression. White dashed line: BLA outline. Grey dashed rectangle: fiber tract. Blue:  
 1175 DAPI, Green: GCaMP6s. Scale 500  $\mu$ m. Individual fiber placements are shown in **Fig. S3.1A**.

1176 B) Fluorescence traces from BLA of GCaMP6s-expressing CaMKII $\alpha$ -Cre mice. During the last  
 1177 day PT, (data shown for Mouse 1) correct nose pokes (green line) were followed by a modest  
 1178 rise in BLA principal cell activity that increased steeply following receptacle entry (**Fig. S3.1B**)  
 1179 while incorrect nose pokes (grey line) were followed by a persistent decrease in activity. Mean  $\pm$   
 1180 SEM, correct (n = 44), incorrect (n = 141). Signal and reference channels (% $\Delta F/F_0$ ) during nose



1181 pokes are shown in **Fig. S3.1C-D**. Incorrect nose pokes on last day of PT vs Training Day 1  
1182 shown in **Fig. S3.2B**.

1183 C) Behavioral responding of CaMKII $\alpha$ -Cre mice expressing GCaMP6s in BLA. Individual mice  
1184 acquired the task at different rates as measured by rewards earned. Horizontal white line:  
1185 acquisition threshold, when a mouse began to earn ~20 rewards consistently in Training.  
1186 Incorrect nose pokes shown in **Fig. S3.2A**.

1187 D) Heatmap of BLA principal cell activity (Mouse 1) across all training phases, aligned to tone  
1188 onset (Tone), correct nose poke (NP), and receptacle entry (Rec). Each row is the average of  
1189 rewarded trials across a training session. White horizontal line: Day acquisition threshold met,  
1190 as determined by rewards earned. Black horizontal lines: divisions between training phases.  
1191 Black vertical lines: divisions between breaks in time to allow for variable latencies in tone  
1192 onset, correct nose poke, and receptacle entry. Blanks in the heatmaps indicate time bins  
1193 added for alignment. Individual data for mice 2-3 in **Fig. S3.1E-F**. Incorrect nose pokes  
1194 heatmaps for individual mice shown in **Fig S3.2C-E**.

1195 E) Heatmap of BLA principal cell activity averaged across mice. Signal aligned as in D) with a  
1196 selection of key days shown, from bottom to top: PT Day 1, PT Day 4, Training Day 3,  
1197 Acquisition day (white horizontal line), Last Extinction Day. Black horizontal lines: divisions  
1198 between training phases. Black vertical lines: divisions between breaks in time to allow for  
1199 variable latencies in tone onset, correct nose poke, and receptacle entry. Incorrect nose poke  
1200 heatmaps averaged across mice shown in **Fig. S3.2F**.

1201

1202

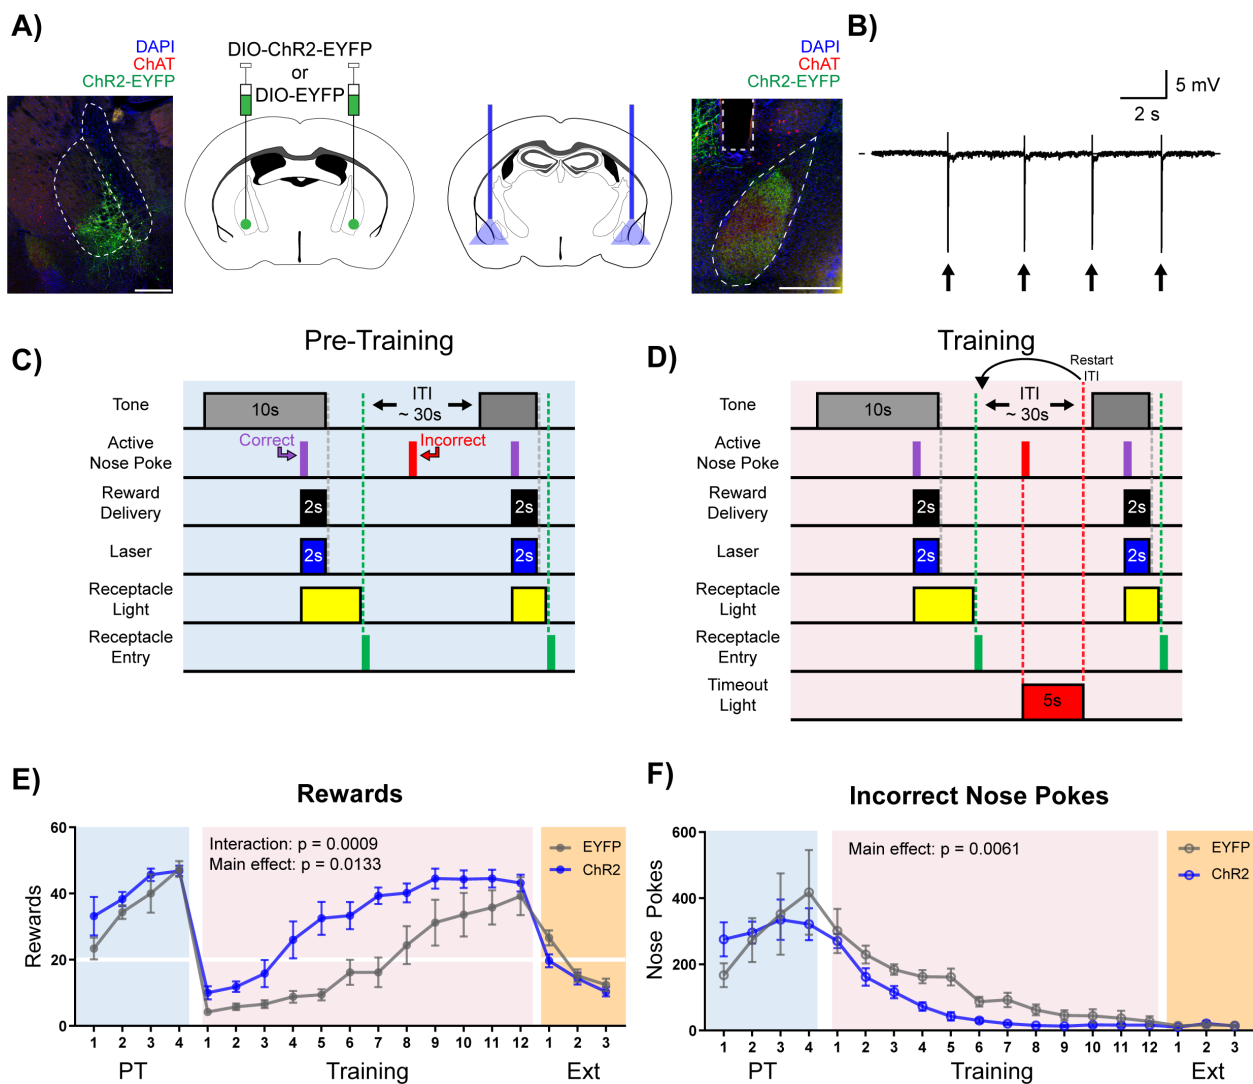

1203

1204 **Fig. 4. Stimulation of Cholinergic Terminal Fibers in the BLA Enhances Cue-Reward**

1205 **Learning.**

1206 A) Schematic of optical stimulation of ChAT<sup>+</sup> terminal fibers projecting to the BLA. Left: Bilateral

1207 AAV injection into the NBM of ChAT-IRES-Cre mice to gain optical control over ChAT<sup>+</sup> NBM

1208 cells and representative coronal brain slice showing ChR2-EYFP expression. White dashed

1209 lines: internal capsule and globus pallidus outlines. Blue: DAPI, red: ChAT, green: ChR2-EYFP.

1210 Scale: 500  $\mu$ m, individual injection sites shown in Fig. S4.1A and separate channels shown in

1211 Fig. S4.1B. Right: Bilateral optical fiber implantation above BLA to stimulate BLA-projecting

1212 ChAT<sup>+</sup> NBM cells. Representative coronal brain slice showing ChR2-EYFP expression and fiber

1213 tip placement. Grey dashed rectangle: fiber tract. White dashed: BLA outline. Blue: DAPI, red:  
1214 ChAT, green: ChR2-EYFP. Scale: 500  $\mu\text{m}$ , individual fiber tip placements shown in **Fig. S4.1C**  
1215 and separate channels shown in **Fig. S4.1D**. Injection sites and fiber tip placements for males  
1216 from **Fig. S4.2C-F** shown in **S4.3A-B**.

1217 B) Optical stimulation validation via local field potential recordings. Extracellular recording of  
1218 action potentials induced by optical stimulation of ChAT<sup>+</sup> NBM cells expressing ChR2. Arrows  
1219 indicate 60 ms laser pulse.

1220 C-D) Details of the Cue-Reward Learning Paradigm C) During Pre-Training, auditory tones were  
1221 presented on a variable interval 30 schedule (VI30), during which an active nose poke (correct)  
1222 yielded Ensure reward delivery and 2 sec of optical stimulation but there was no consequence  
1223 for incorrect nose pokes (active nose pokes not during tone). D) Training was identical to Pre-  
1224 Training, except incorrect nose pokes resulted in a 5 sec timeout, signaled by house light  
1225 illumination, followed by a restarting of the ITI.

1226 E) Behavioral performance in a cue-reward learning task improves with optical stimulation of  
1227 ChAT<sup>+</sup> fibers in BLA. EYFP- and ChR2-expressing mice earn similar numbers of rewards during  
1228 PT (blue shaded region). ChR2-expressing mice more rapidly earn significantly more rewards  
1229 than EYFP-expressing mice during Training (pink shaded region). No significant differences  
1230 were observed during extinction training (orange shaded region). Horizontal white line:  
1231 acquisition threshold, when a mouse began to earn ~20 rewards consistently in Training. Mean  
1232  $\pm$  SEM, EYFP: n = 5, ChR2: n = 6. Individual data are shown in **Fig. S4.2A**. Data for males  
1233 shown in **Fig. S4.2C,E**.

1234 F) EYFP- and ChR2-expressing mice made similar numbers of incorrect nose pokes during Pre-  
1235 Training. ChR2-expressing mice made significantly fewer incorrect nose pokes than EYFP-  
1236 expressing mice in Training. No significant differences were observed during extinction training.

1237 Mean  $\pm$  SEM, EYFP: n = 5, Chr2: n = 6. Individual data are shown in **Fig. S4.2B**. Data for  
1238 males shown in **Fig. S4.2D,F**. Additional behavioral assays shown in **Fig. S4.4A-F**.

1239

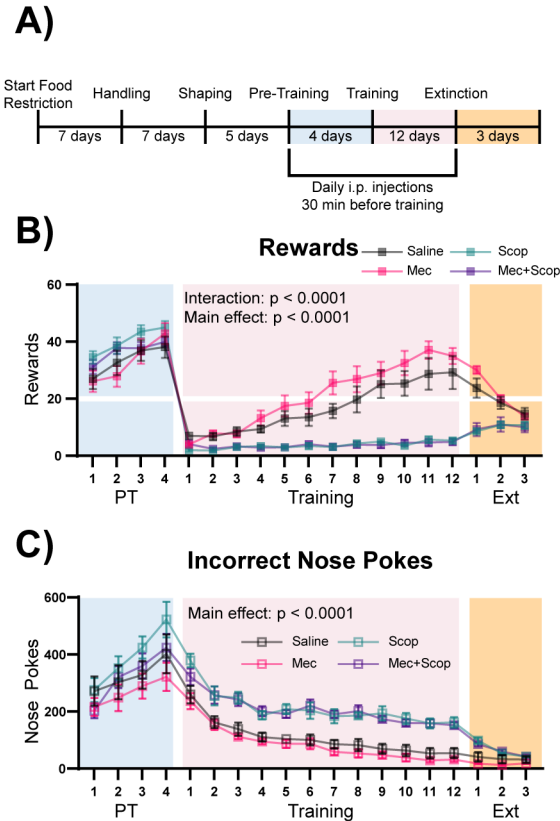

1240

1241 **Fig. 5. Muscarinic, but not Nicotinic, ACh Receptor Antagonism Prevents Learning of a**  
 1242 **Cue-Reward Contingency**

1243 A) Timeline of drug administration. Saline or ACh receptor (AChR) antagonists were delivered  
 1244 i.p., 30 min before PT and Training sessions, the same phases of the task as optical stimulation  
 1245 in **Fig. 4.**

1246 B) Behavioral performance of mice administered AChR antagonists. AChR antagonists had no  
 1247 significant effect on rewards earned during Pre-Training. Muscarinic AChR antagonism (Scop  
 1248 and Mec+Scop) resulted in significantly fewer rewards earned during Training. There was no  
 1249 significant difference between saline controls and those receiving the nicotinic AChR antagonist  
 1250 (Mec) during Training and mice extinguished responding at similar rates. Mean  $\pm$  SEM Saline (n  
 1251 = 8), Mec (n = 9), Scop (n = 8), Mec+Scop (n = 9). Horizontal white line: acquisition threshold,

1252 when a mouse began to earn ~20 rewards consistently in Training. Individual data are shown in  
1253 **Fig. S5.1A**.

1254 C) Incorrect nose pokes. Incorrect nose poking was not affected by AChR antagonism during  
1255 PT but Scop- and Scop+Mec-treated mice maintained high levels of incorrect nose pokes  
1256 compared to Saline- and Mec-treated mice throughout Training. Mean  $\pm$  SEM, Saline (n = 8),  
1257 Mec (n = 9), Scop (n = 8), or Mec+Scop (n = 9). Individual data are shown in **Fig. S5.1B**. AChR  
1258 antagonist locomotor test shown in **Fig. S5.1C**

1259

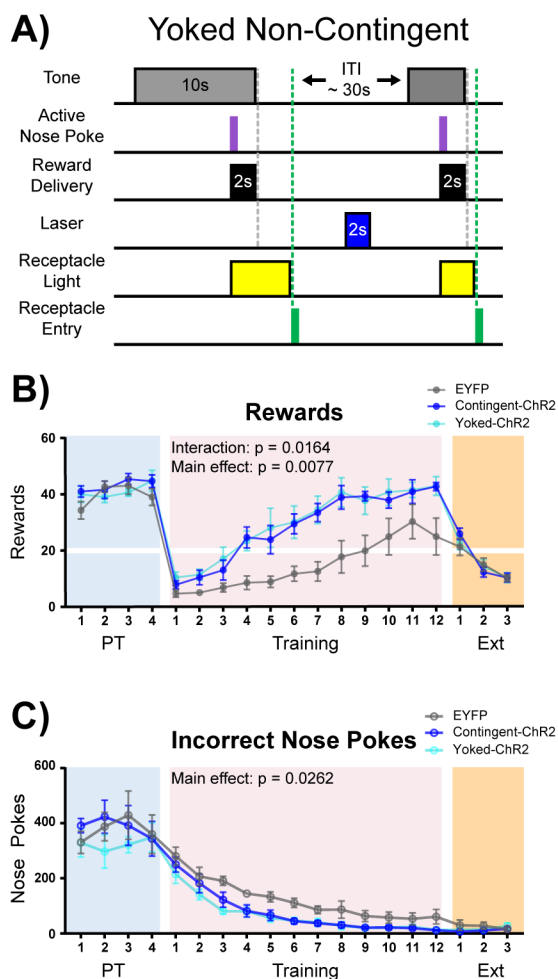

1260  
1261 **Fig. 6. Non-Contingent Stimulation of ChAT<sup>+</sup> NBM-BLA Terminals is Sufficient to Enhance**  
1262 **Cue-Reward Learning**

1263 A) Experimental details of laser stimulation in non-contingent yoked mice. Yoked non-contingent  
1264 ChR2-expressing mice received the same number of light stimulations as contingent ChR2-  
1265 expressing mice, but stimulation was only given during the ITI, when Yoked mice had not made  
1266 a response within 2 sec. Injection sites and fiber placements are shown in **Fig. S6.1 A-B**.

1267 B) Yoked non-contingent NBM-BLA optical stimulation also improves behavioral performance in  
1268 cue-reward learning task. There was no significant difference in the number of rewards earned  
1269 between EYFP (n = 6), Contingent-ChR2 (n = 5), or Yoked-ChR2 (n = 5) mice during Pre-  
1270 Training. Contingent- and Yoked-ChR2-expressing mice more rapidly earned significantly more

1271 rewards during Training than EYFP-expressing mice. No differences were observed between  
1272 groups during extinction training. Mean  $\pm$  SEM EYFP: n = 6, contingent-ChR2: n = 5, Yoked-  
1273 ChR2: n = 5. Horizontal white line: acquisition threshold, when a mouse began to earn ~20  
1274 rewards consistently in Training. Individual data are shown in **Fig. S6.2A**.

1275 C) Incorrect nose pokes. There was no significant difference in the number of incorrect nose  
1276 pokes between groups during Pre-Training. Contingent- and Yoked-ChR2-expressing mice  
1277 made significantly fewer incorrect nose pokes during Training than EYFP-expressing mice. No  
1278 differences between groups were observed during extinction training. Mean  $\pm$  SEM EYFP: n =  
1279 6, ChR2: n = 5, Yoked: n = 5. Individual data are shown in **Fig. S6.2B**.

1280

1281



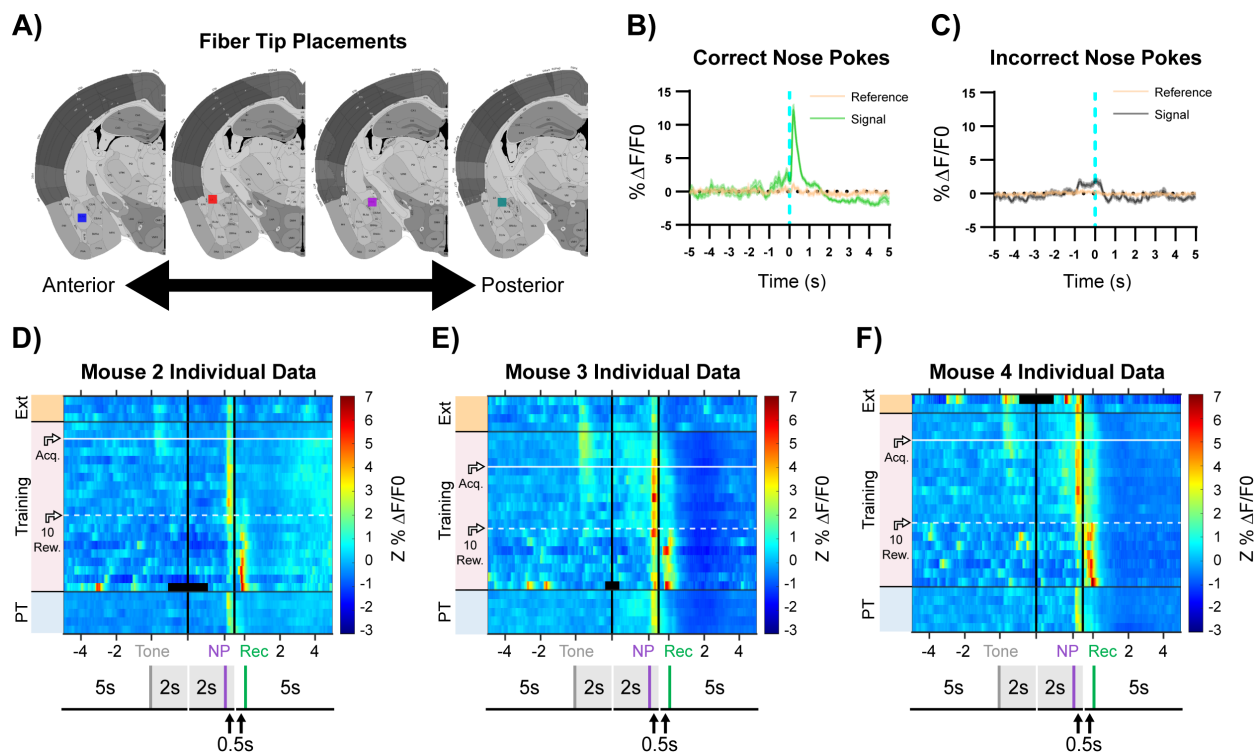

1282

1283 **Fig. S2.1 Supplemental Data for Fig. 2 A-E**

1284 A) Squares indicate optical fiber tips for individual mice. 1 (red), 2 (blue), 3 (teal), 4 (purple).

1285 B) Increase in fluorescence (% $\Delta F/F_0$ ) following correct nose pokes is specific to the signal (465  
 1286 nm, green) channel and is not observed in the reference channel (405 nm, tan). Data from  
 1287 Mouse 1 PT Day 5 as in **Fig. 2C**. Mean  $\pm$  SEM, n = 24.

1288 C) Minimal increase in fluorescence (% $\Delta F/F_0$ ) following incorrect nose pokes. Signal (465 nm,  
 1289 grey) channel, reference channel (405 nm, tan). Data from Mouse 1 PT Day 5 as in **Fig. 2C**.  
 1290 Mean  $\pm$  SEM, n = 58.

1291 D-F) Individual mouse data for mice 2-4 as shown in **Fig. 2D**. Dashed white horizontal line: first  
 1292 Training day earning 10 rewards (10 Rew.). White horizontal line: acquisition threshold (Acq.).

1293

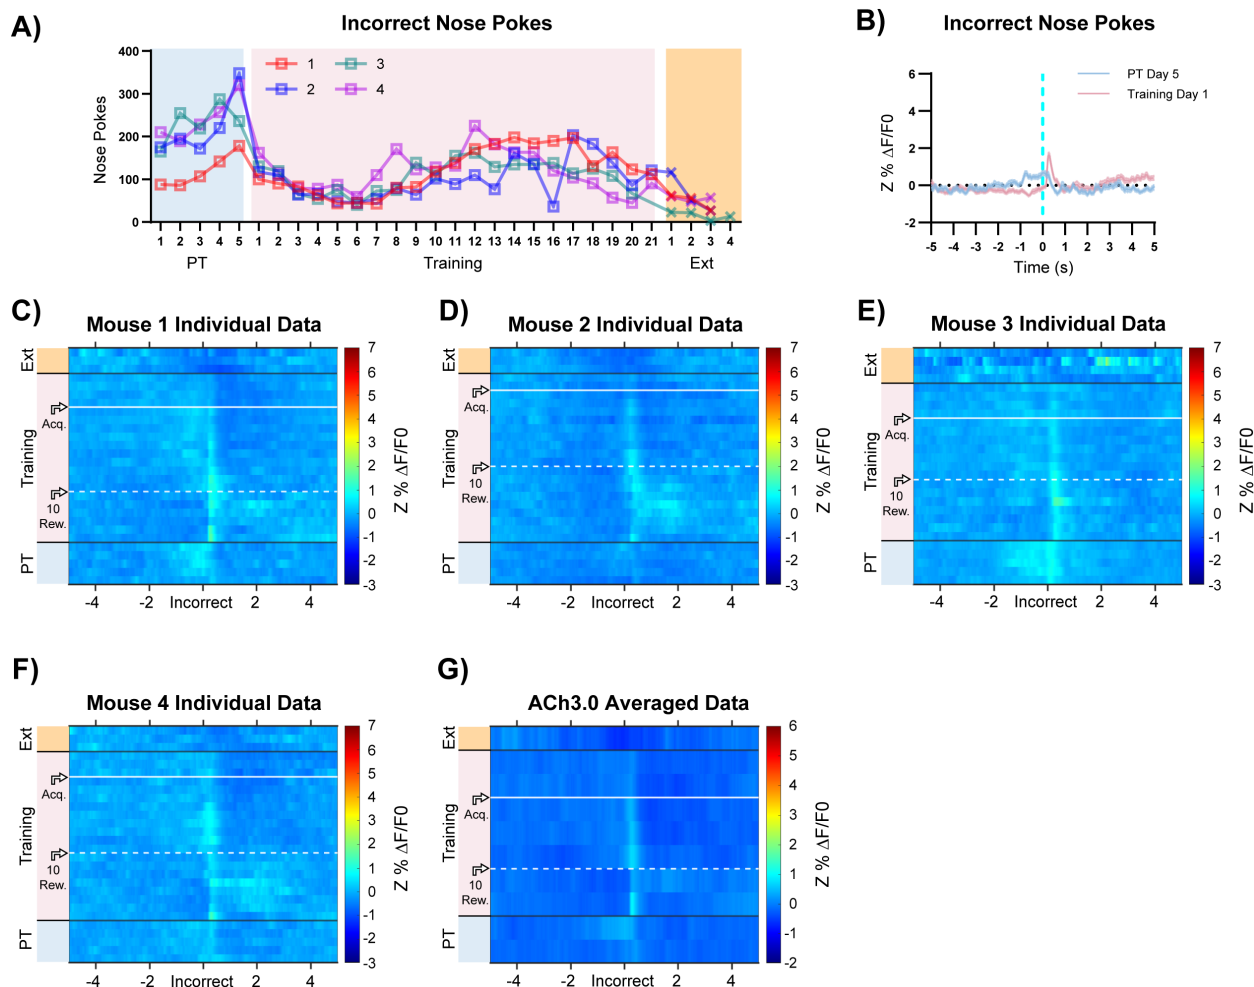

1294

1295 **Fig. S2.2 Supplemental Data for Fig. 2 A-E**

1296 A) Incorrect nose poking of individual mice throughout training.

1297 B) Incorrect nose pokes that yield timeouts (Training Day 1, pink line, n = 66) result in increase  
 1298 in BLA ACh signaling but incorrect nose pokes before timeouts are introduced (PT Day 5, blue  
 1299 line, n = 58) do not. Data from Mouse 1 as in **Fig. 2C**, Mean ± SEM.

1300 C-F) Individual mouse heatmaps of BLA ACh signaling across all training phases, aligned to  
 1301 incorrect nose poke. Each row is the average of incorrect nose pokes that led to (or would have  
 1302 led to for PT) a timeout across a session. White dashed horizontal line: first Training day  
 1303 earning 10 rewards. Horizontal white line: acquisition threshold, when a mouse began to earn  
 1304 ~20 rewards consistently in Training. Black horizontal lines: divisions between training phases.

1305 G) Heatmap of BLA ACh signaling during incorrect nose poke averaged across mice. Signal  
1306 aligned as in C-F) with a selection of data from key days in the behavioral paradigm shown.  
1307 From bottom to top: PT Day 1, PT Day 5, Training Day 1, Training Day 3, First Training day  
1308 earning 10 rewards (white dashed horizontal line), Training Day 13, Training Day 15, Acquisition  
1309 day (white horizontal line), Last Training Day, Last Extinction Day. Black horizontal lines:  
1310 divisions between training phases.

1311

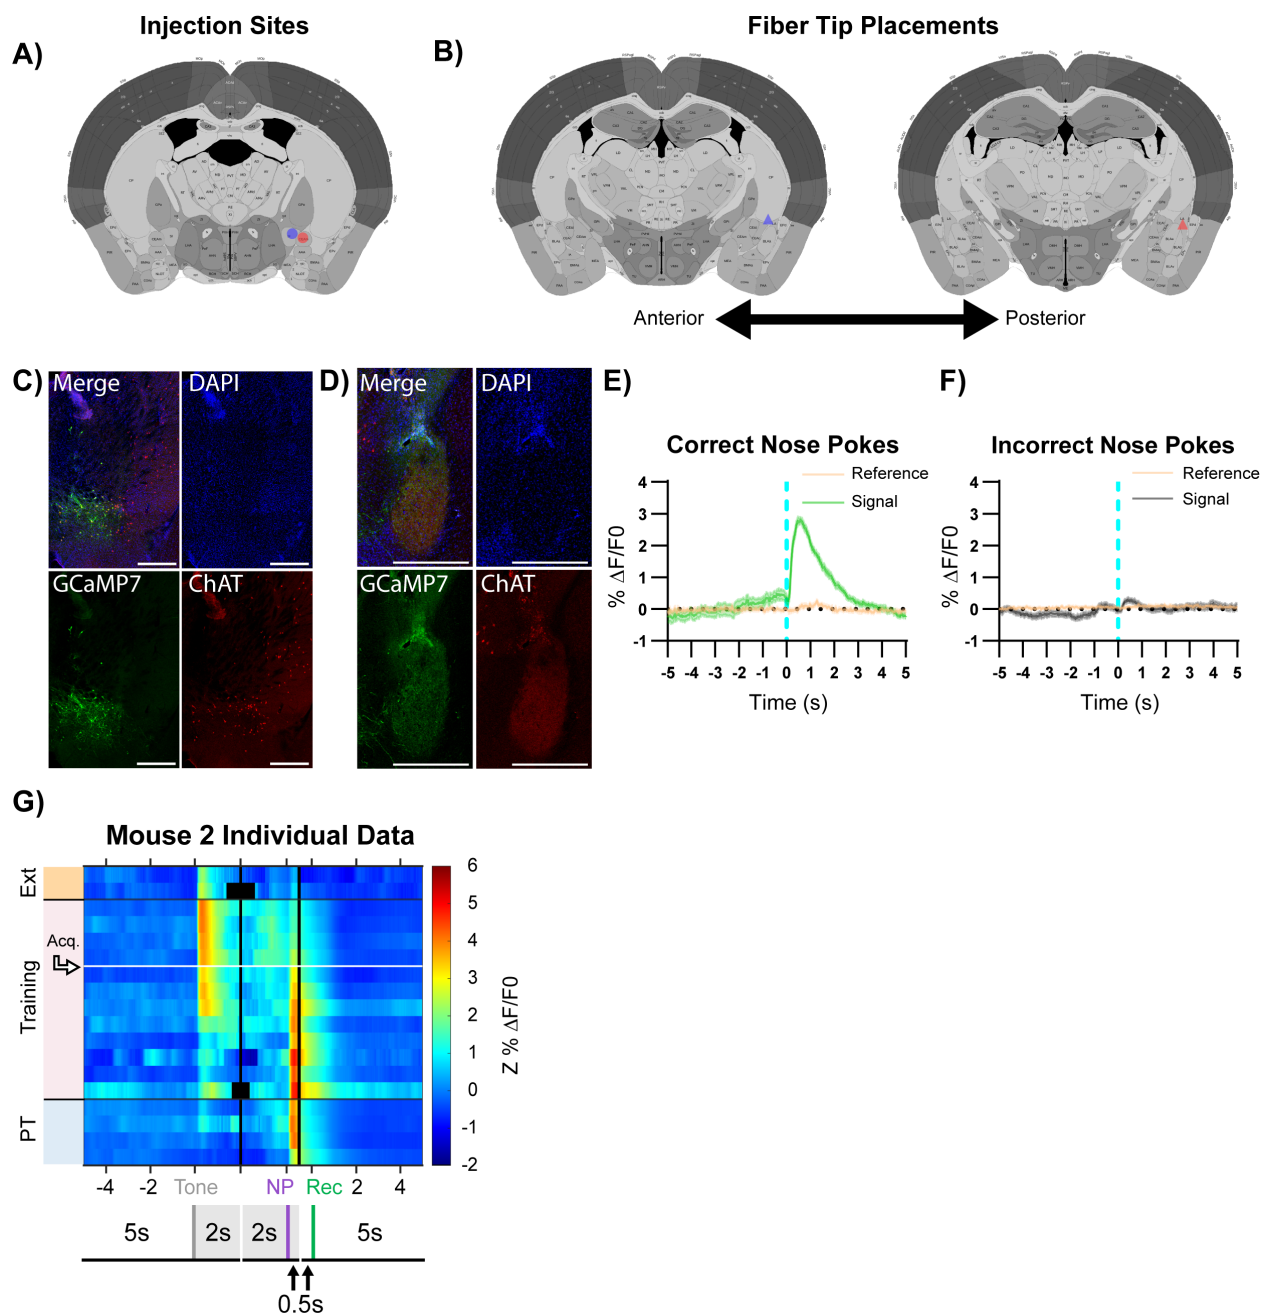

1312

1313 **Fig. S2.3 Supplemental Data for Fig. 2 F-J**

1314 A) Circles indicate NBM DIO-GCaMP7s injection sites for individual mice, 1 (red), 2 (blue).

1315 B) Triangles indicate estimated optical fiber tips based on adjacent slices for individual mice. 1

1316 (red), 2 (blue).

1317 C) Representative injection site coronal slice from **Fig. 2F** with channels separated. Scale = 500  
1318  $\mu\text{m}$ .

1319 D) Representative fiber tip site coronal slice from **Fig. 2F** with channels separated. Scale = 500  
1320  $\mu\text{m}$ .

1321 E) Increase in fluorescence ( $\% \Delta F/F_0$ ) following correct nose pokes is specific to the signal (465  
1322 nm, green) channel and is not observed in the reference channel (405 nm, tan). Data from  
1323 Mouse 1 PT Day 4 as in **Fig. 2H**. Mean  $\pm$  SEM, n = 42.

1324 F) Minimal increase in fluorescence ( $\% \Delta F/F_0$ ) following incorrect nose pokes. Signal (465 nm,  
1325 grey) channel, reference channel (405 nm, tan). Data from Mouse 1 PT Day 4 as in **Fig. 2H**.  
1326 Mean  $\pm$  SEM, n = 101.

1327 G) Individual data for mouse 2 as shown in **Fig. 2I**. White horizontal line: acquisition threshold.

1328

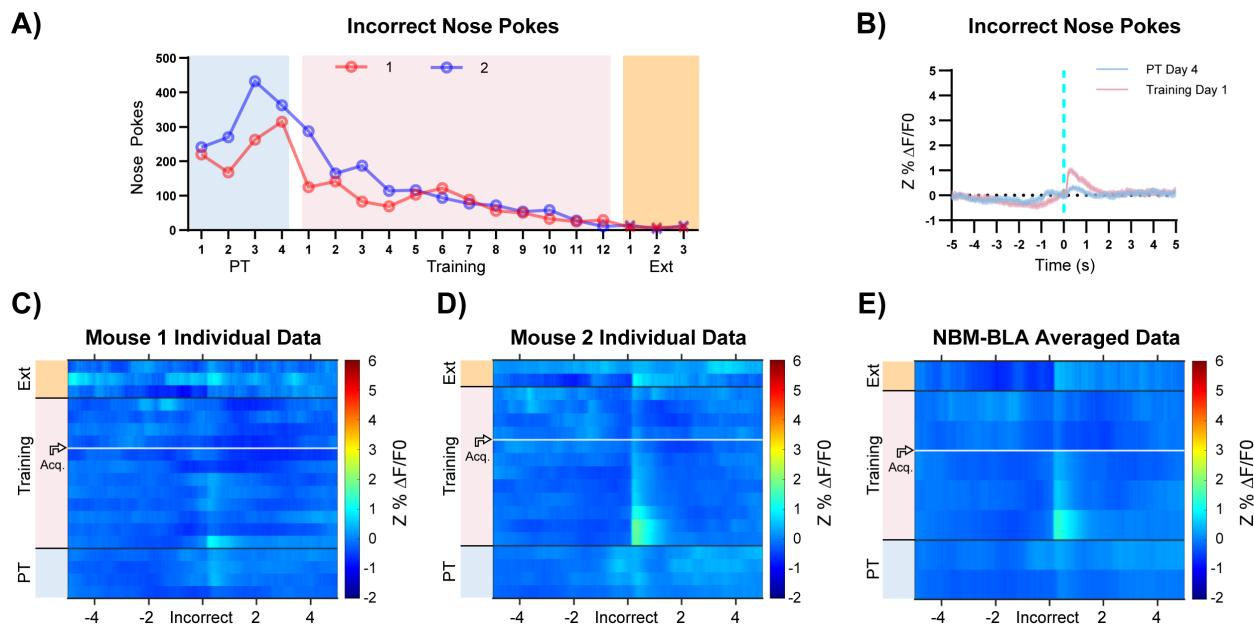

1329

1330 **Fig. S2.4 Supplemental Data for Fig. 2F-J**

1331 A) Incorrect nose poking of individual mice throughout training.

1332 B) Incorrect nose pokes that yield timeouts (Training Day 1, pink line, n = 105) result in increase  
 1333 in NBM-BLA terminal fiber activity but incorrect nose pokes before timeouts are introduced (PT  
 1334 Day 4, blue line, n = 101) do not. Data from Mouse 1 as in **Fig. 2H**, Mean  $\pm$  SEM.

1335 C-D) Individual mouse heatmaps of NBM-BLA terminal fiber activity across all training phases,  
 1336 aligned to incorrect nose poke. Each row is the average of incorrect nose pokes that led to (or  
 1337 would have led to for PT) a timeout across a session. Horizontal white line: acquisition  
 1338 threshold, when a mouse began to earn ~20 rewards consistently in Training. Black horizontal  
 1339 lines: divisions between training phases.

1340 E) Heatmap of NBM-BLA terminal fiber activity during incorrect nose poke averaged across  
 1341 mice. Signal aligned as in C-D) with a selection of data from key days in the behavioral  
 1342 paradigm shown. From bottom to top: PT Day 1, PT Day 4, Training Day 1, Training Day 3,  
 1343 Training Day 6, Acquisition day (white horizontal line), Last Training Day, Last Extinction Day.  
 1344 Black horizontal lines: divisions between training phases.

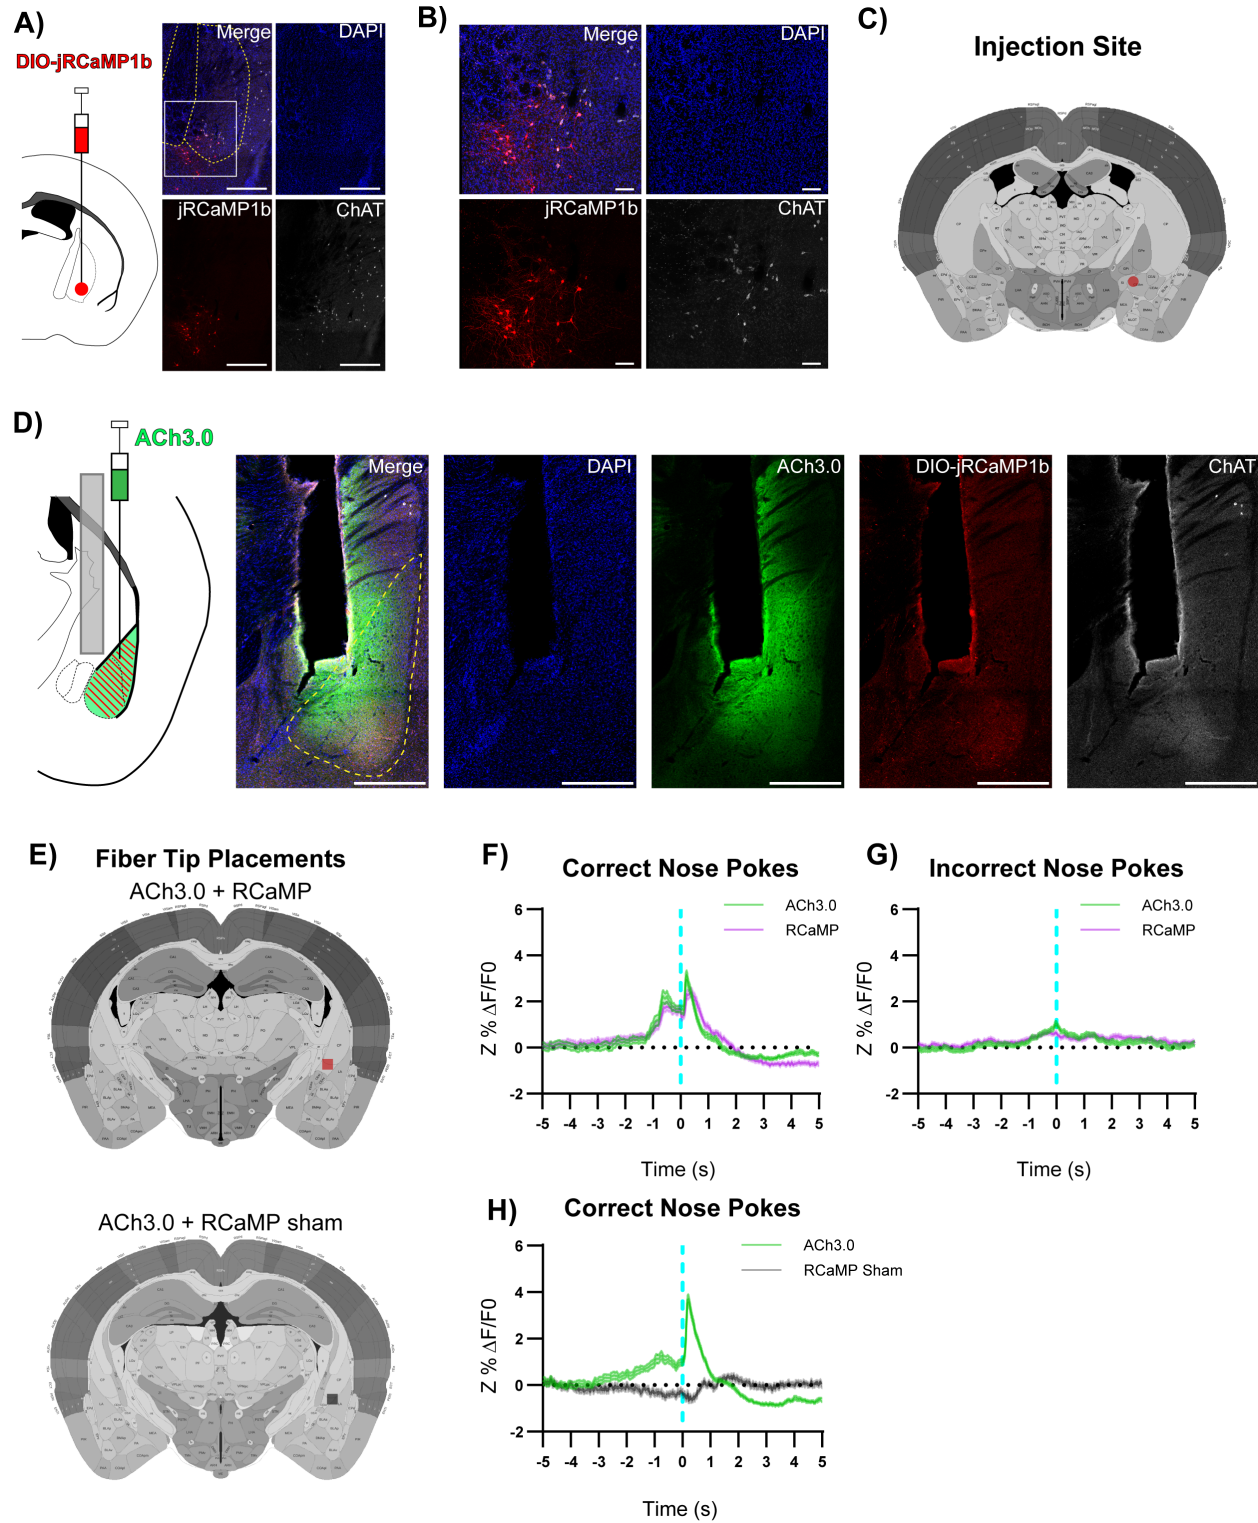

1345

1346 **Fig. S2.5 Supplemental Data for Fig. 2**



1347 A) Left: DIO-jRCaMP1b was injected in the NBM of ChAT-IRES-Cre mice. Representative  
1348 coronal brain slice showing jRCaMP1b expression. Yellow dashed lines: internal capsule and  
1349 globus pallidus outlines. Scale = 500  $\mu$ m. White box: higher magnification area shown in B).

1350 B) Higher magnification of injection site. Scale = 100  $\mu$ m.

1351 C) Circle indicates NBM DIO-jRCaMP1b injection site for mouse 1.

1352 D) ACh3.0 was injected into the ipsilateral BLA and an optical fiber was implanted above the  
1353 BLA. White dashed line: BLA outline. Scale = 500  $\mu$ m.

1354 E) Squares indicate optical fiber tips for individual mice. ACh3.0 + RCaMP (red), ACh3.0 +  
1355 RCaMP sham (grey),

1356 F) A substantial increase in both fluorescence representing BLA ACh release (green line) and  
1357 NBM-BLA cholinergic terminal activity (magenta line) coincided with correct nose pokes on last  
1358 day of PT. Mean  $\pm$  SEM, (n = 42).

1359 G) Minimal increase in fluorescence in either channel following incorrect nose pokes on last day  
1360 of PT. Mean  $\pm$  SEM, (n = 94)

1361 H) jRCaMP1b signal is not simply crosstalk from ACh3.0 channel. A substantial increase in  
1362 fluorescence representing BLA ACh release (green line) following correct nose pokes did not  
1363 necessitate signal in RCaMP sham red channel (grey line). Last day of PT. Mean  $\pm$  SEM, n =  
1364 44.

1365



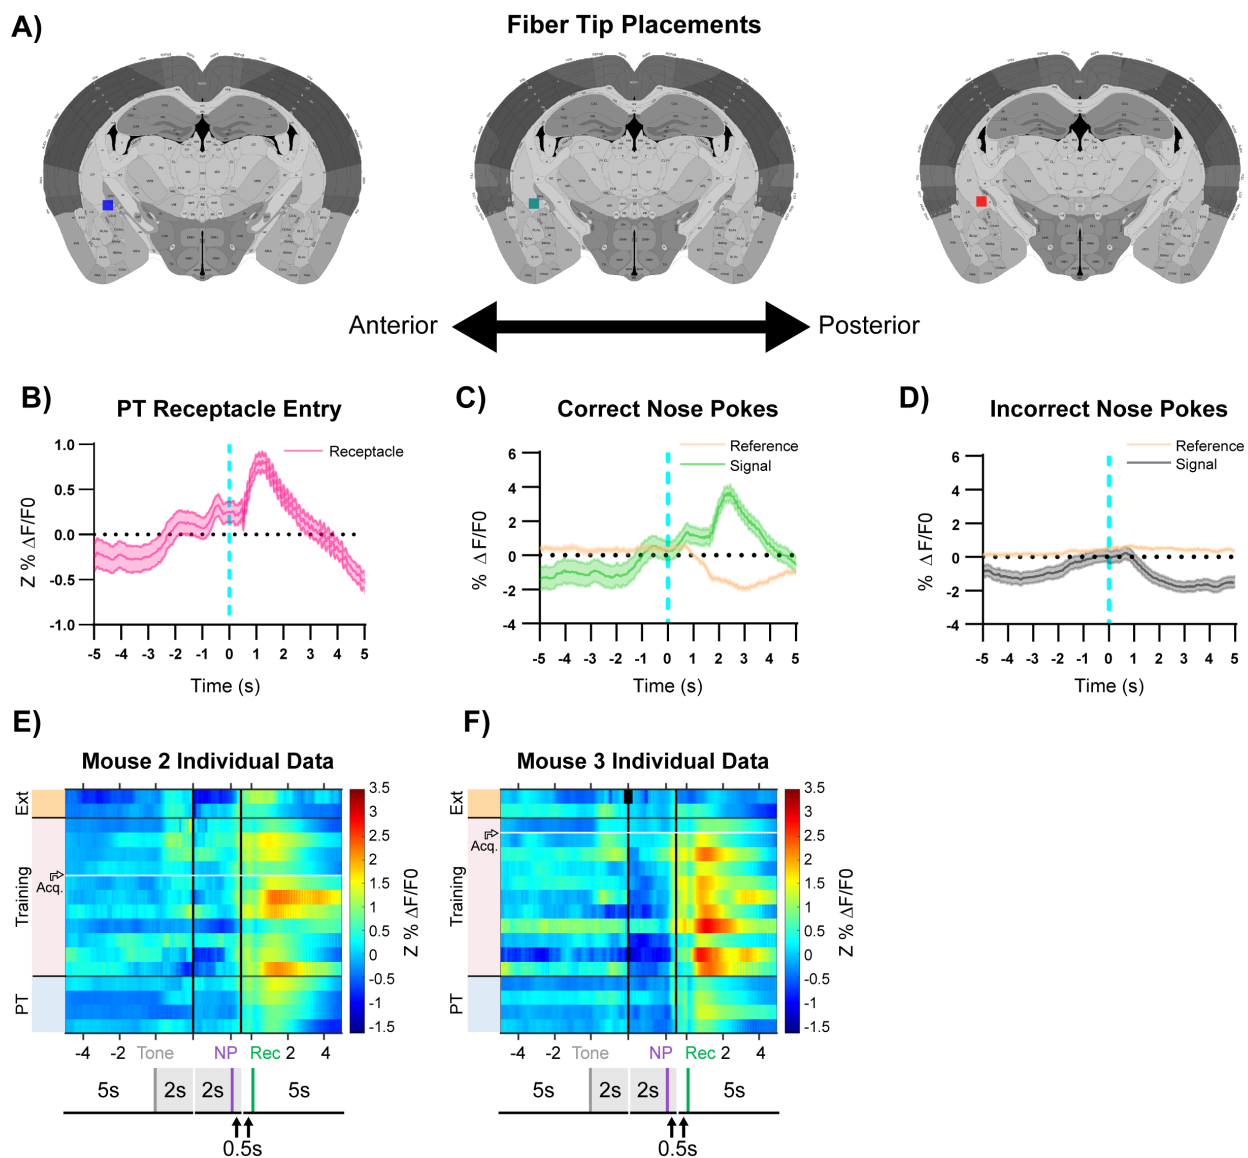

1366

1367 **Fig. S3.1 Supplemental Data for Fig. 3**

1368 A) Squares indicate optical fiber tips for individual mice. 1 (red), 2 (blue), 3 (teal).

1369 B) Increase in fluorescence ( $Z\% \Delta F/F_0$ ) during last day of PT (data shown for Mouse 1) aligns

1370 more closely to receptacle entry (reward retrieval) on rewarded trials. Mean  $\pm$  SEM,  $n = 44$ .

1371 C) Increase in fluorescence ( $\% \Delta F/F_0$ ) following correct nose pokes is specific to the signal (465

1372 nm, green) channel and is not observed in the reference channel (405 nm, tan). Dip in reference

1373 channel following correct nose poke is likely due to not acquiring at the “true” isosbestic point of

1374 GCaMP (Barnett et al., 2017; C. K. Kim et al., 2016; Sych et al., 2019)). Data from Mouse 1, PT  
1375 Day 4 as in **Fig. 3B**. Mean  $\pm$  SEM, n = 44.

1376 D) Decrease in fluorescence ( $\% \Delta F/F_0$ ) following incorrect nose pokes is seen in signal channel  
1377 (465 nm, grey), but not reference channel (405 nm, tan). Data from Mouse 1, PT Day 4 as in  
1378 **Fig. 3B**. Mean  $\pm$  SEM, n = 141.

1379 E-F) Individual data for mice not shown in **Fig. 3D**. White horizontal line: acquisition threshold.

1380

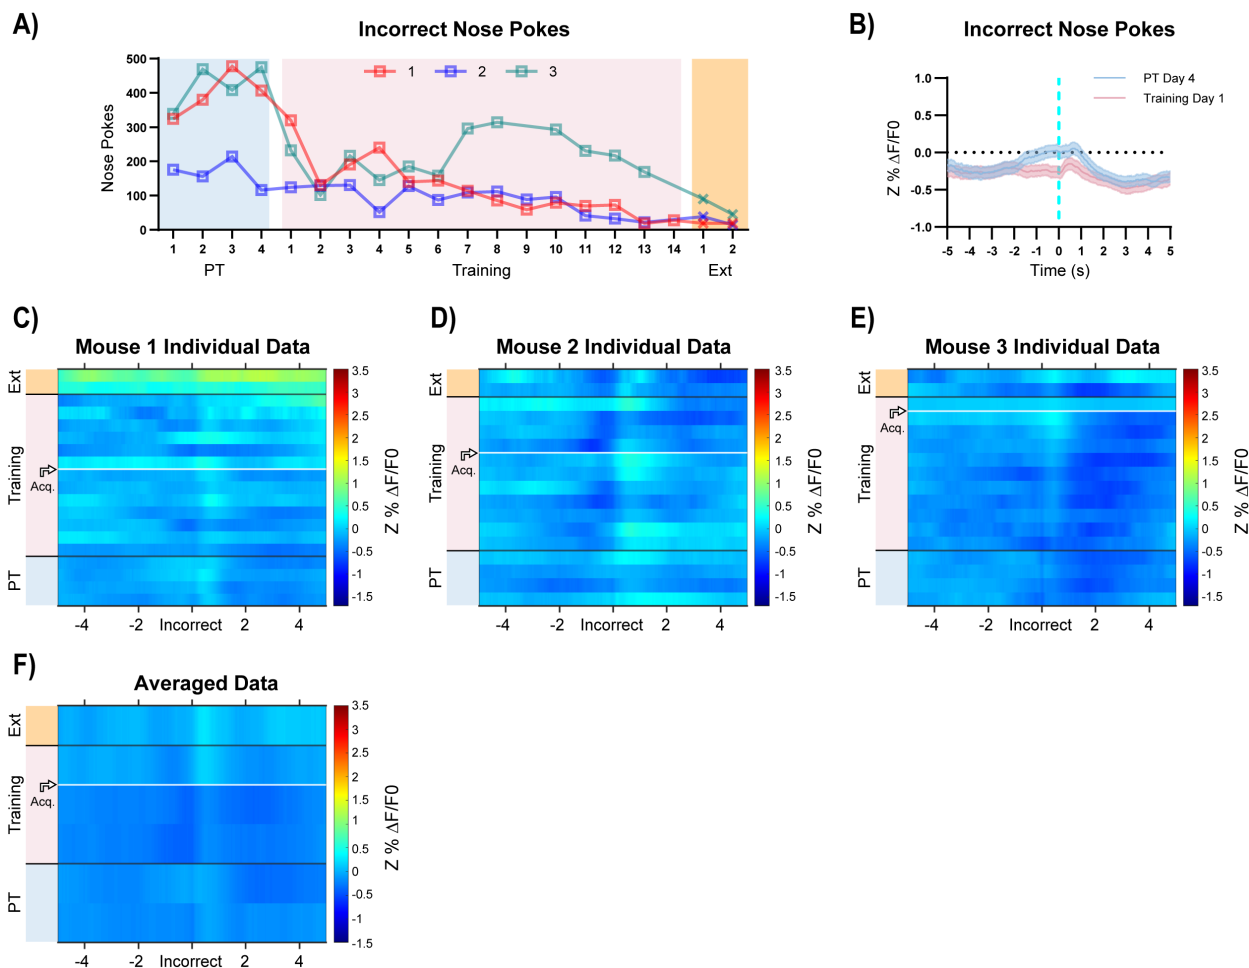

1381

1382 **Fig. S3.2 Supplemental Data for Fig. 3**

1383 A) Incorrect nose pokes of individual mice throughout training.

1384 B) Both incorrect nose pokes that yield timeouts (Training Day 1, pink line, n = 124) and

1385 incorrect nose pokes before timeouts are introduced (PT Day 4, blue line, n = 141) result in a

1386 decrease in BLA principal neuron activity. Data from Mouse 1 as in **Fig. 3B**, Mean  $\pm$  SEM.

1387 C-E) Individual mouse heatmaps of BLA principal neuron activity across all training phases,

1388 aligned to incorrect nose poke. Each row is the average of incorrect nose pokes that led to (or

1389 would have led to for PT) a timeout across a session. Horizontal white line: acquisition

1390 threshold, when a mouse began to earn ~20 rewards consistently in Training. Black horizontal

1391 lines: divisions between training phases.

1392 F) Heatmap of BLA principal neuron activity during incorrect nose poke averaged across mice.  
1393 Signal aligned as in C-E) with a selection of data from key days in the behavioral paradigm  
1394 shown. From bottom to top: PT Day 1, PT Day 4, Training Day 1, Training Day 3, Acquisition  
1395 day (white horizontal line), Last Extinction Day. Black horizontal lines: divisions between training  
1396 phases.  
1397

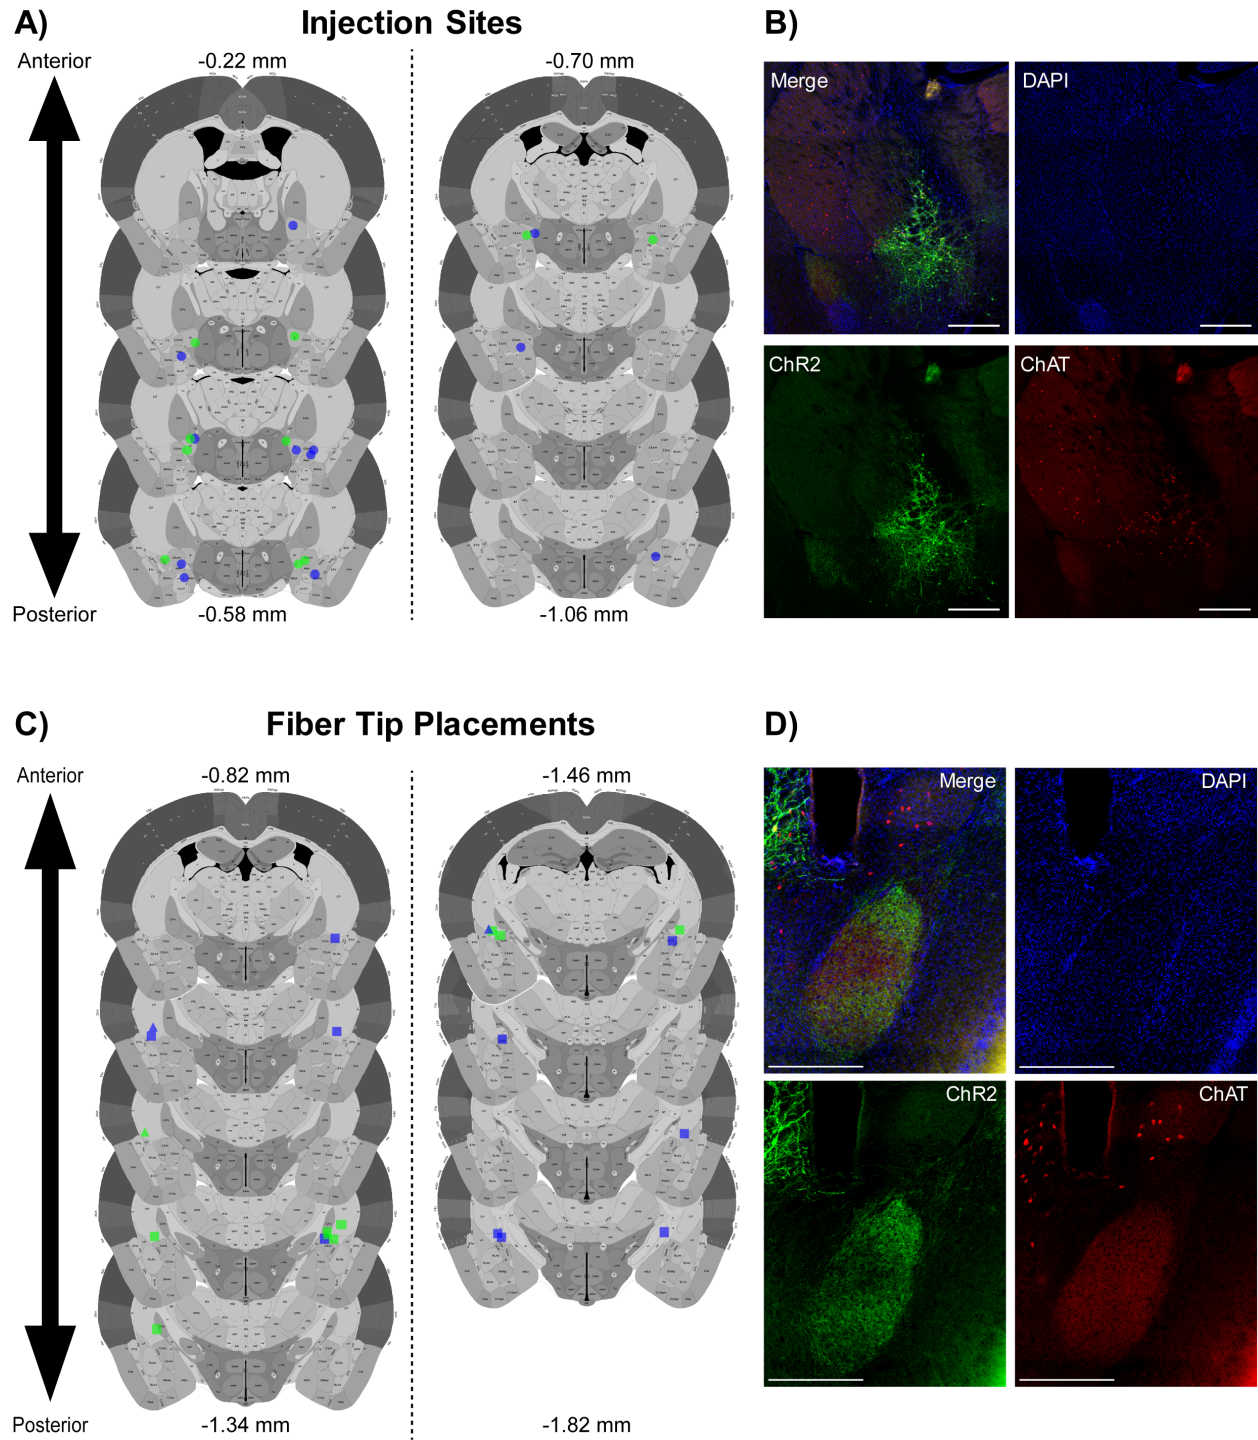

1398

1399

1400

1401

**Fig. S4.1 Injection Sites Optical Fiber Placements for Fig. 4**

A) Circles indicate NBM injection sites for individual mice, EYFP (green) and ChR2 (blue).

Anterior/Posterior position relative to Bregma indicated.

1402 B) Representative injection site coronal slice from **Fig. 4A** with channels separated. Scale = 500  
1403  $\mu\text{m}$ .

1404 C) Squares indicate observable optical fiber tips for individual mice, EYFP- (green) and ChR2-  
1405 expressing mice (blue). Triangles indicate estimated optical fiber tips based on adjacent slices.  
1406 Anterior/Posterior position relative to Bregma indicated.

1407 D) Representative fiber tip site coronal slice from **Fig. 4A** with channels separated. Scale = 500

1408

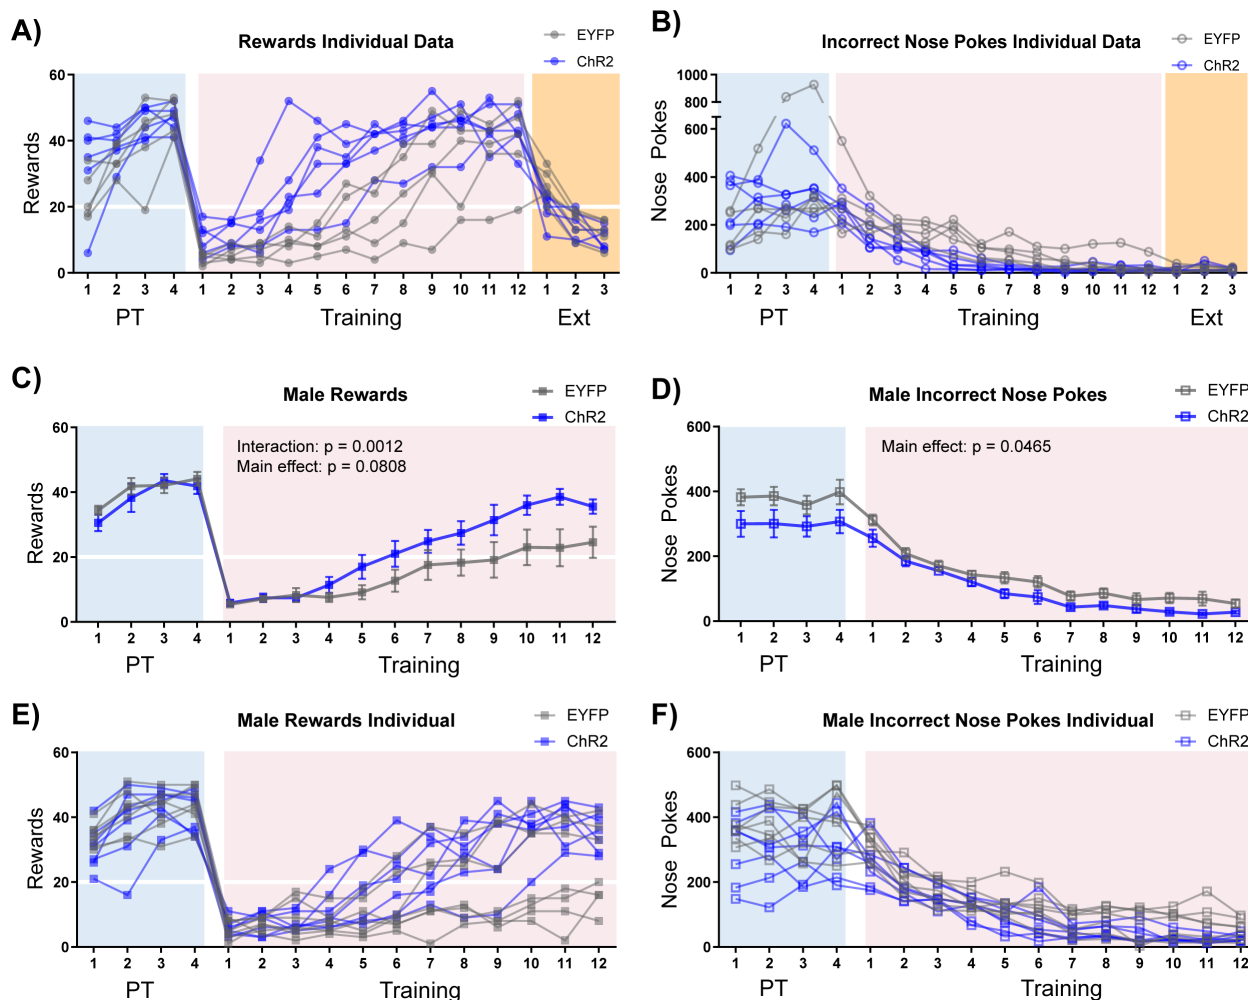

1409

1410 **Fig. S4.2 Individual Data for Fig. 4 and Males**

1411 A) Rewards earned for individual mice from **Fig. 4E**. Horizontal white line: acquisition threshold,  
 1412 when a mouse began to earn ~20 rewards consistently in Training.

1413 B) Incorrect nose pokes for individual mice from **Fig. 4F**.

1414 C) Optical stimulation of ChAT<sup>+</sup> NBM-BLA terminal fibers (ChR2-expressing mice, blue squares)  
 1415 had a similar effect on rewards earned during Training in male mice compared to female mice.

1416 Mean  $\pm$  SEM, EYFP:  $n = 7$ , ChR2:  $n = 7$ . Horizontal white line: acquisition threshold, when a

1417 mouse began to earn ~20 rewards consistently in Training.

1418 D) Optical stimulation of ChAT<sup>+</sup> NBM-BLA terminal fibers (ChR2-expressing mice, blue squares)  
1419 had a similar effect on incorrect nose pokes during Training in male mice compared to female  
1420 mice. Mean  $\pm$  SEM, EYFP: n = 7, ChR2: n = 7.

1421 E) Individual data for graph shown in C).

1422 F) Individual data for graph shown in D).

1423



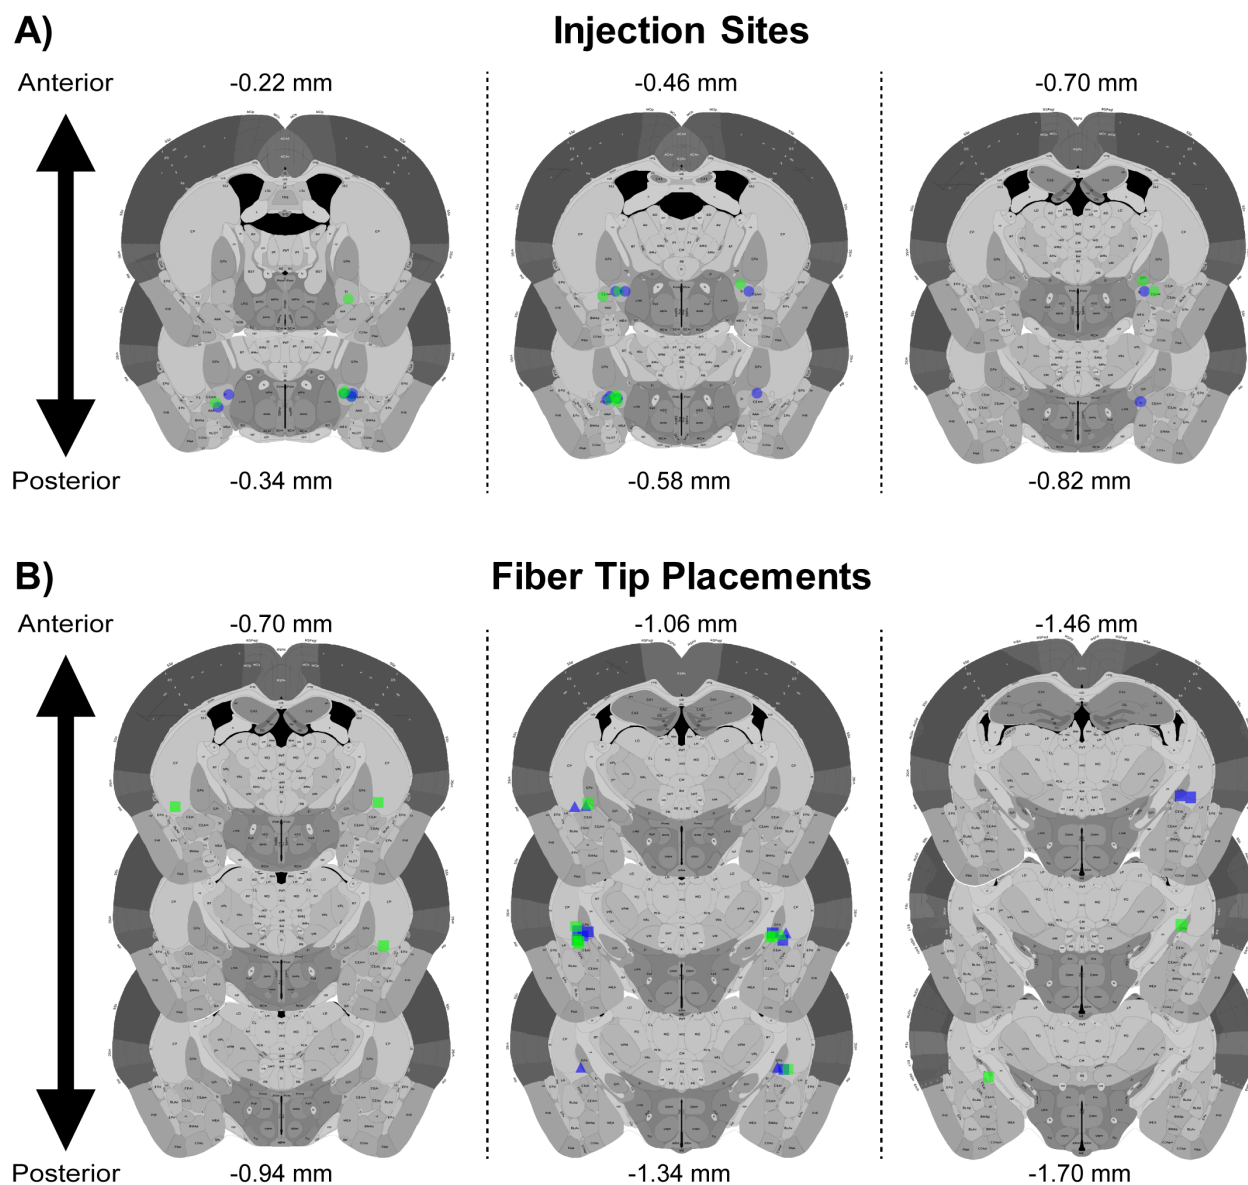

1424

1425 **Fig. S4.3 Injection Sites and Optical Fiber Placements for Fig. S4.2C-F**

1426 A) Circles indicate NBM injection sites for individual mice, EYFP- (green) and ChR2-expressing  
1427 mice (blue). Anterior/Posterior position relative to Bregma indicated.

1428 B) Squares indicate observable optical fiber tips for individual mice, EYFP- (green) and ChR2-  
1429 expressing mice (blue). Triangles indicate estimated site of optical fiber tips based on adjacent  
1430 slices. Anterior/Posterior position relative to Bregma indicated.

1431

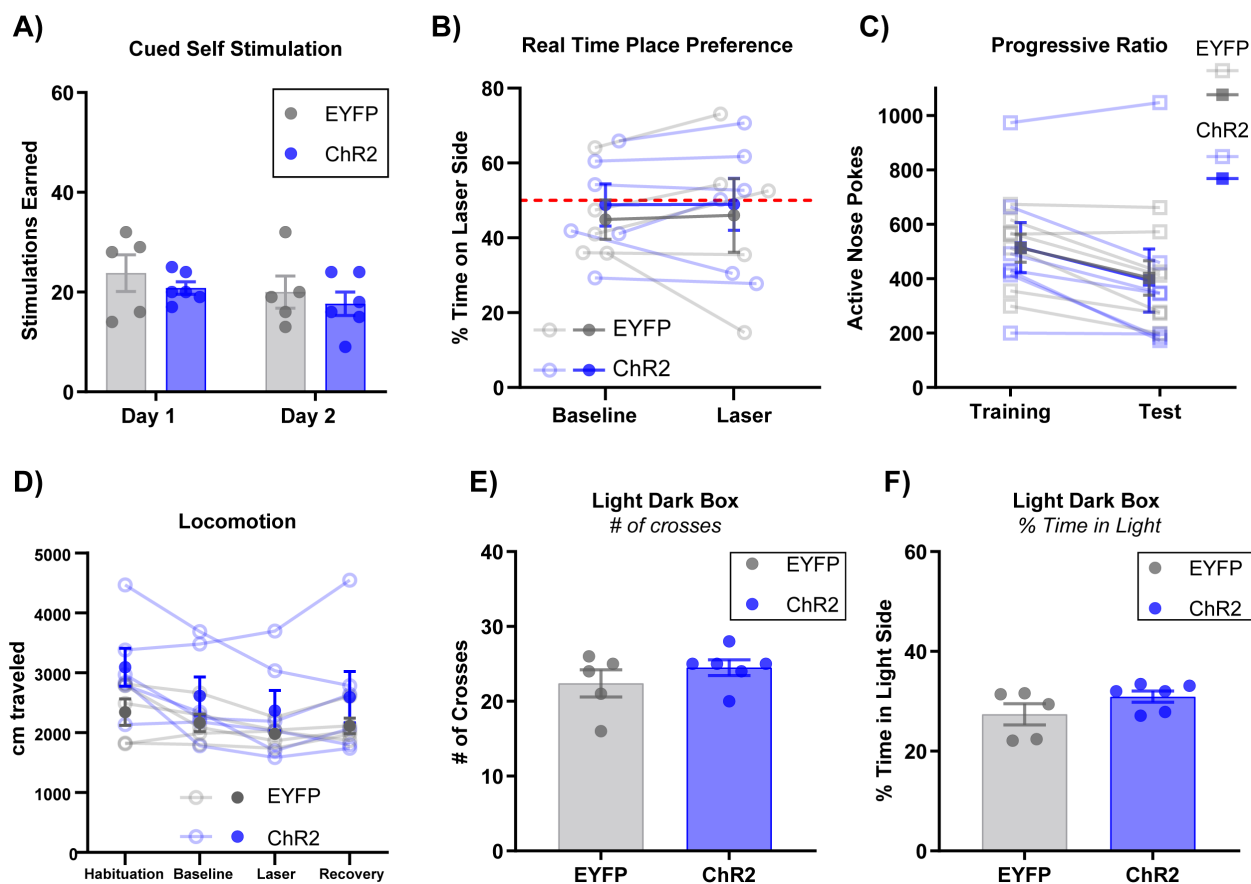

1432

1433 **Fig. S4.4 Additional Behavioral Assays for Fig. 4**

1434 A) Stimulation of ChAT<sup>+</sup> NBM-BLA terminal fibers did not support self-stimulation. Mice were  
 1435 allowed to nose poke for 2 sec of stimulation in the Training paradigm. Data for female mice  
 1436 from **Fig. 4 + Fig. S4.1-S4.2A-B.**

1437 B) Stimulation of ChAT<sup>+</sup> NBM-BLA terminal fibers did not support real time place preference.  
 1438 Mice were allowed to move freely between two sides of an empty cage with distinct floor  
 1439 contexts for 15 min. Data are reported as percent time spent on the laser-paired side. Closed  
 1440 circles: Mean  $\pm$  SEM, open circles: data for individual mice. Data for female mice from **Fig. 4 +**  
 1441 **Fig. S4.1-S4.2 A-B.**

1442 C) Stimulation of ChAT<sup>+</sup> NBM-BLA terminal fibers during a progressive ratio test did not affect  
1443 active nose poking. Closed squares: Mean  $\pm$  SEM, open squares: individual mice. Data for male  
1444 mice from **Fig. S4.2C-F + S4.3**.

1445 D) There were no differences between EYFP- and ChR2-expressing mice in locomotor activity.  
1446 X-axis ticks = 5 min bins, Laser = 5 min of 20 sec on/off optical stimulation. Closed circles:  
1447 Mean  $\pm$  SEM, open circles: data for individual mice. Data for female mice from **Fig. 4 + Fig.**  
1448 **S4.1-S4.2 A-B**.

1449 E-F) No difference in behavior was seen between EYFP- and ChR2-expressing mice on any  
1450 measures in the Light/Dark Box Test. Data for female mice from **Fig. 4 + Fig. S4.1-S4.2 A-B**.

1451

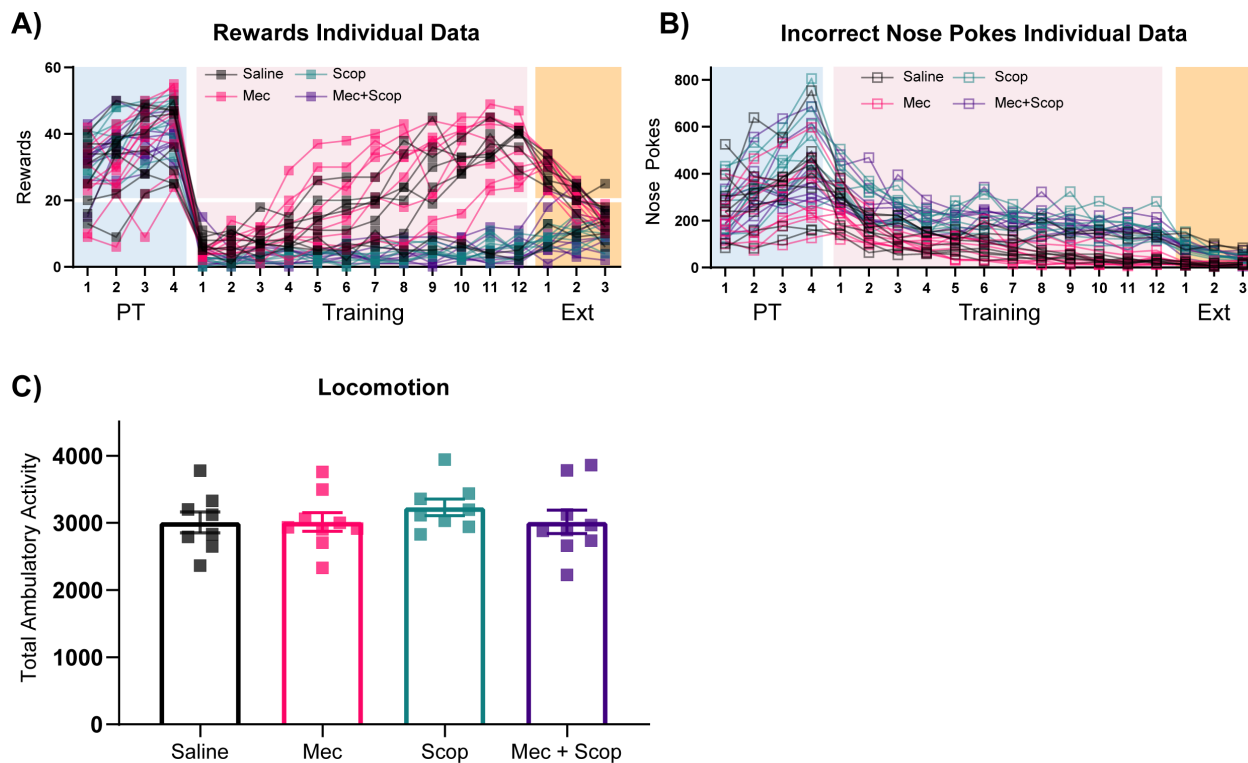

1452

1453 **Fig. S5.1 Individual Data for Fig. 5 and Locomotion**

1454 A) Rewards earned for individual mice from **Fig. 5B**. Horizontal white line: acquisition threshold,  
1455 when a mouse began to earn ~20 rewards consistently in Training.

1456 B) Incorrect nose pokes for individual mice from **Fig. 5C**.

1457 C) There were no differences in locomotion for antagonists.

1458

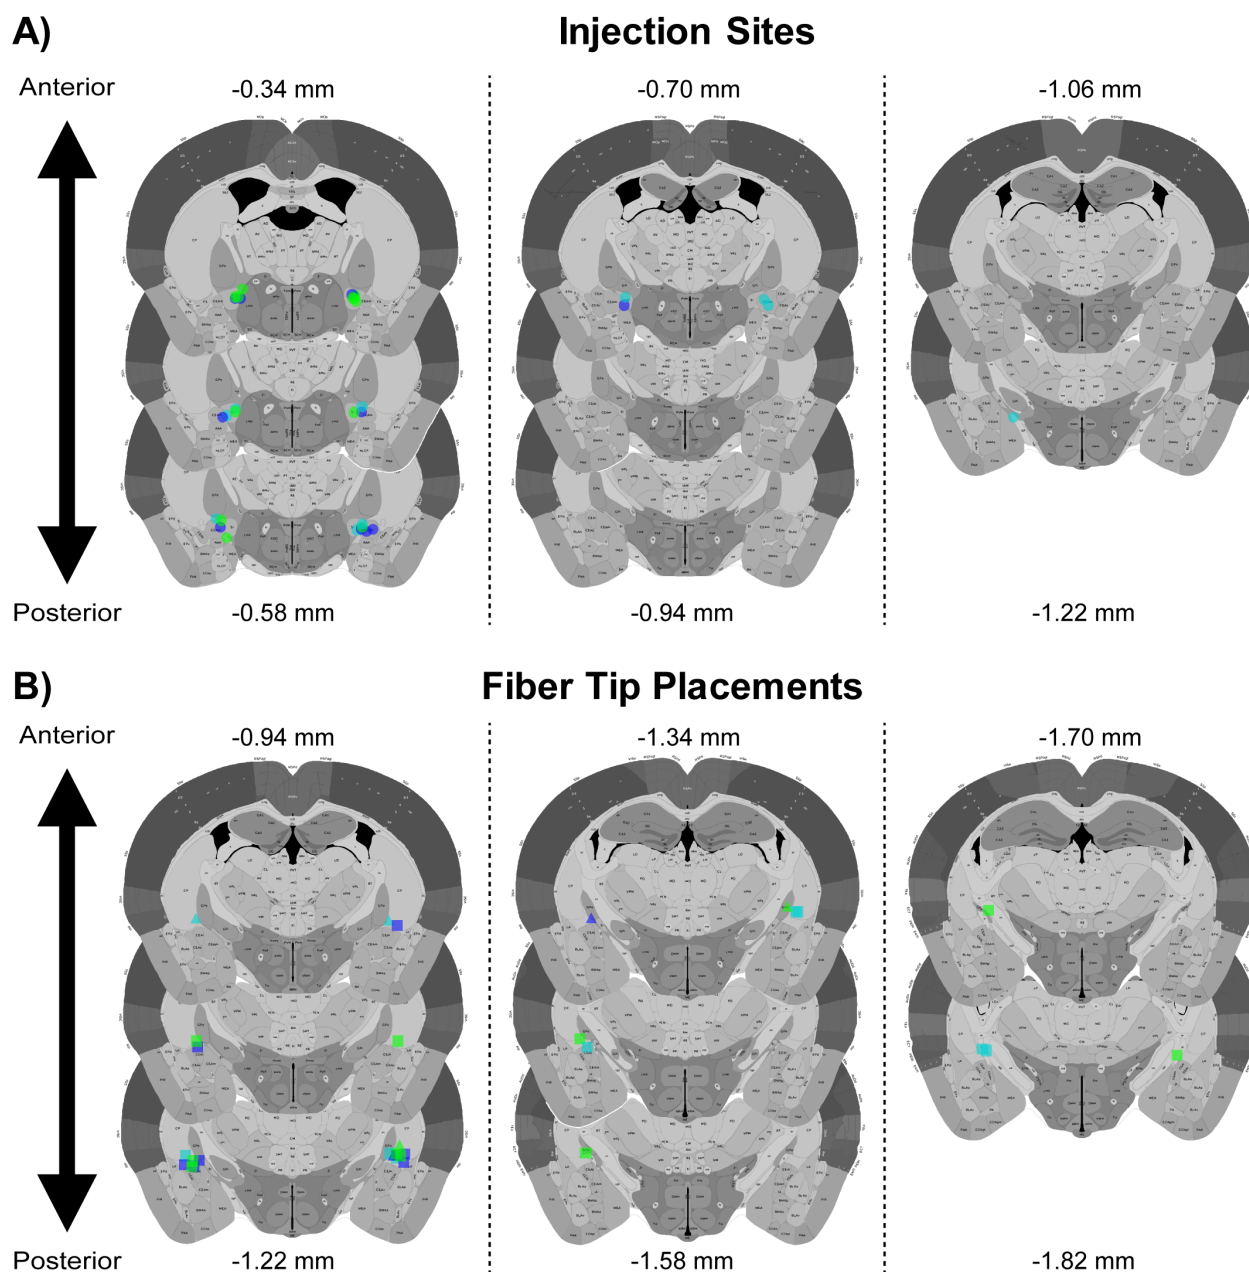

1459

1460 **Fig. S6.1 Injection Sites and Optical Fiber Placements for Fig. 6**

1461 A) Circles indicate NBM injection sites for individual mice, EYFP-expressing (green), ChR2-  
1462 expressing Contingent (blue), and ChR2-expressing Yoked mice (cyan). Anterior/Posterior  
1463 position relative to Bregma indicated.

1464 B) Squares indicate observable optical fiber tips for individual mice, EYFP-expressing (green),  
1465 ChR2-expressing Contingent (blue), and ChR2-expressing Yoked mice (cyan). Triangles

1466 indicate estimated site of optical fiber tips based on adjacent slices. Anterior/Posterior position  
1467 relative to Bregma indicated.

1468

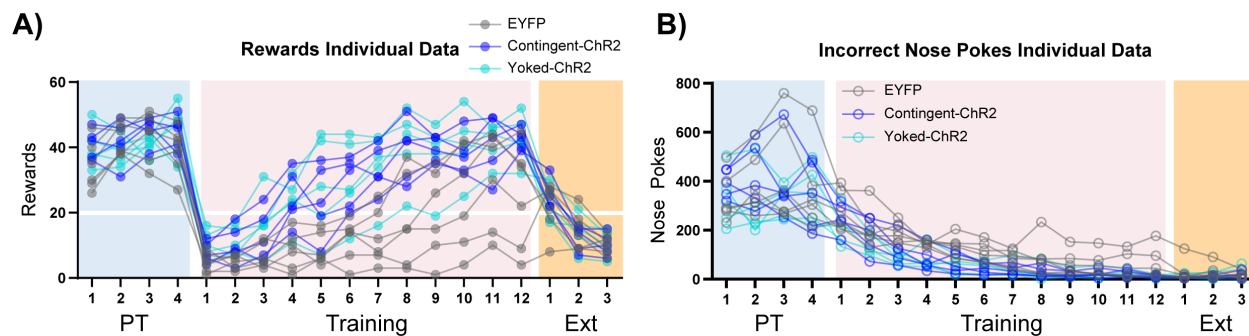

1469

1470 **Fig. S6.2 Individual Data for Fig. 6**

1471 A) Rewards earned for individual mice from **Fig. 6B**. Horizontal white line: acquisition threshold,

1472 when a mouse began to earn ~20 rewards consistently in Training.

1473 B) Incorrect nose pokes for individual mice from **Fig. 6C**.

1474

1475
